# Supplementary material for: β-Cyclodextrin: a green supramolecular catalyst assisted eco-friendly one-pot three-component synthesis of biologically active substituted pyrrolidine-2-one
Source: Royal Society of Chemistry journal article supplement (doi:10.1039/d2ra08054k), 2023-01-01

## SUPPORTING DATA

### **$\beta$ -cyclodextrin: a green supramolecular catalyst assisted eco-friendly one-pot three-component synthesis of biologically active substituted pyrrolidine-2-one**

Subhankar Paul<sup>a</sup>, Sharmistha Das<sup>a</sup>, Bijeta Mitra<sup>a</sup>, Gyan Chandra Pariyar<sup>b</sup>, and Pranab Ghosh<sup>a\*</sup>

<sup>a</sup>Department of Chemistry, University of North Bengal, District-Darjeeling, West Bengal, India.

<sup>b</sup>Department of Food Technology, University of North Bengal, District-Darjeeling, West Bengal, India.

Tel.: +91 (0353) 2776381; fax: +91 (0353) 2699001.

E-mail address: pizy12@yahoo.com (P. Ghosh).

| Table of contents |                                                                                                                                                                                                                                                                                       | Page no. |
|-------------------|---------------------------------------------------------------------------------------------------------------------------------------------------------------------------------------------------------------------------------------------------------------------------------------|----------|
| I                 | General Information                                                                                                                                                                                                                                                                   | 2        |
| II                | General procedure for the synthesis of Methyl/Ethyl 2-aryl-4-hydroxy-5-oxo-1-phenyl-2,5-dihydro-1 <i>H</i> -pyrrole-3-carboxylate (4a-4i) & (6a-6e) and Methyl/Ethyl 1-aryl-4-hydroxy-5-oxo-2-phenyl-2,5-dihydro-1 <i>H</i> -pyrrole-3-carboxylate (5a-5d) & (7a-7b)                  | 2        |
| III               | Characterization data of the synthesized derivatives of Methyl/Ethyl 2-aryl-4-hydroxy-5-oxo-1-phenyl-2,5-dihydro-1 <i>H</i> -pyrrole-3-carboxylate (4a-4i) & (6a-6e) and Methyl/Ethyl 1-aryl-4-hydroxy-5-oxo-2-phenyl-2,5-dihydro-1 <i>H</i> -pyrrole-3-carboxylate (5a-5d) & (7a-7b) | 2        |
| IV                | Scanned copy of NOSEY NMR spectra of inclusion complex of aldehydes and $\beta$ -CD                                                                                                                                                                                                   | 10       |
| V                 | Scanned copies of the <sup>1</sup> H, <sup>13</sup> C and <sup>19</sup> F NMR of synthesised derivatives                                                                                                                                                                              | 11       |

## I. General Information

All the easily available reagents, precursors and solvents used for our research work were purchased from the commercial suppliers and were used without further purification. The solvents used for TLC and column chromatography i.e., petroleum ether and ethyl acetate were used after purification by distillation.  $^1\text{H-NMR}$ ,  $^{13}\text{C-NMR}$ , and  $^{19}\text{F-NMR}$  were recorded using 400 MHz, 100 MHz and 376 MHz respectively on Bruker AV 400 NMR spectrometer and Bruker AV 300 NMR Spectrometer using TMS (Tetramethyl silane) as the internal standard. The splitting patterns of protons were described as s (singlet), d (doublet), t (triplet) and m (multiples).

## II. General procedure for the synthesis of Methyl/Ethyl 2-aryl-4-hydroxy-5-oxo-1-phenyl-2,5-dihydro-1*H*-pyrrole-3-carboxylate (4a-4i) & (6a-6e) and Methyl/Ethyl 1-aryl-4-hydroxy-5-oxo-2-phenyl-2,5-dihydro-1*H*-pyrrole-3-carboxylate (5a-5d) & (7a-7b)

$\beta$ -Cyclodextrin (10 mg) and 2 ml of water-ethanol (1:1 ratio) were added to the mixture of aldehydes (1 mmol), amines (1 mmol) and dimethylacetylenedicarboxylate (1.2 mmol) or diethylacetylenedicarboxylate (1.2 mmol) contained in a reaction vessel. The resulting reaction mixture was then stirred in a magnetic stirrer at room temperature for 8 h in open air. The progress of the reaction was monitored by TLC using petroleum ether and ethyl acetate as eluent solvent in silica bed on aluminium sheet. After completion of the reaction as indicated by TLC, a momentous amount of water and ethyl acetate were added to the reaction mixture and extracted thrice by ethyl acetate with the help of separating funnel. The extracted ethyl acetate solution was then passed through the bed of anhydrous sodium sulphate ( $\text{Na}_2\text{SO}_4$ ) to make it a completely water free organic solution and evaporated to a significant amount of volume reduction and the crude product or sometimes the crystal product obtained was then purified by filtering and washing it with ethyl acetate and pet ether mixture. The products obtained were known compounds and identified through  $^1\text{H-NMR}$ ,  $^{13}\text{C-NMR}$  and  $^{19}\text{F-NMR}$  spectroscopies.

## III. Characterization data of the synthesized derivatives of Methyl/Ethyl 2-aryl-4-hydroxy-5-oxo-1-phenyl-2,5-dihydro-1*H*-pyrrole-3-carboxylate (4a-4i) & (6a-6e) and Methyl/Ethyl 1-aryl-4-hydroxy-5-oxo-2-phenyl-2,5-dihydro-1*H*-pyrrole-3-carboxylate (5a-5d) & (7a-7b)

### Methyl 4-hydroxy-5-oxo-1,2-diphenyl-2,5-dihydro-1*H*-pyrrole-3-carboxylate (4a):

pale white solid;

$^1\text{H-NMR}$  (400 MHz,  $\text{DMSO-}d_6$ )  $\delta$ (ppm): 3.562 (s, 3H), 6.048 (s, 1H), 7.194-7.261 (m, 8H), 7.541 (d, 2H,  $J = 7.6$  Hz), 11.746 (s, 1H);

$^{13}\text{C}$ -NMR (100 MHz,  $\text{DMSO-}d_6$ )  $\delta(\text{ppm})$ : 51.570, 61.003, 112.399, 122.976, 125.816, 128.107, 128.381, 128.730, 129.127, 136.695, 136.943, 152.996, 162.920, 164.403.

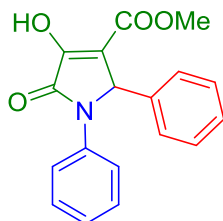

**Methyl 2-(4-fluorophenyl)-4-hydroxy-5-oxo-1-phenyl-2,5-dihydro-1H-pyrrole-3-carboxylate (4b):**

white crystal;

$^1\text{H}$ -NMR (400 MHz,  $\text{DMSO-}d_6$ )  $\delta(\text{ppm})$ : 3.571 (s, 3H), 6.086 (s, 3H), 6.965-7.095 (m, 3H), 7.202-7.341 (m, 4H), 7.480-7.599 (m, 2H), 11.798 (s, 1H);

$^{13}\text{C}$ -NMR (100 MHz,  $\text{DMSO-}d_6$ )  $\delta(\text{ppm})$ : 51.589, 60.231, 112.096, 115.473, 115.688, 123.051, 125.892, 129.161, 130.187, 130.268, 133.165, 136.553, 153.160, 162.920, 163.212, 164.320;

$^{19}\text{F}$ -NMR (376MHz,  $\text{DMSO-}d_6$ )  $\delta(\text{ppm})$ : -114.264.

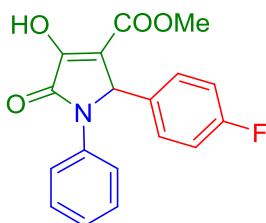

**Methyl 4-hydroxy-5-oxo-1-phenyl-2-(4-(trifluoromethyl)phenyl)-2,5-dihydro-1H-pyrrole-3-carboxylate (4c):**

white crystal;

$^1\text{H}$ -NMR (400 MHz,  $\text{DMSO-}d_6$ )  $\delta(\text{ppm})$ : 3.566 (s, 3H), 6.191 (s, 1H), 7.065-7.102 (m, 1H), 7.265-7.304 (m, 2H), 7.494-7.620 (m, 6H);

$^{13}\text{C}$ -NMR (100 MHz,  $\text{DMSO-}d_6$ )  $\delta(\text{ppm})$ : 51.479, 60.315, 110.747, 122.848, 123.134, 125.597, 125.936, 128.286, 128.596, 129.075, 129.231, 136.605, 142.556, 154.639, 163.232, 164.878;

$^{19}\text{F}$ -NMR (376MHz,  $\text{DMSO-}d_6$ )  $\delta(\text{ppm})$ : -60.998.

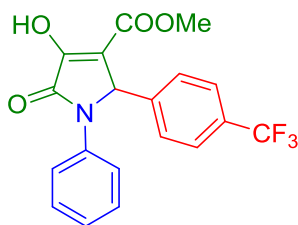

**Methyl 4-hydroxy-2-(4-nitrophenyl)-5-oxo-1-phenyl-2,5-dihydro-1H-pyrrole-3-carboxylate (4d):**

pale yellow solid;

$^1\text{H-NMR}$  (400 MHz,  $\text{DMSO-}d_6$ )  $\delta$ (ppm): 3.483 (s, 3H), 6.098 (s, 1H), 7.026-7.063 (m, 1H), 7.236-7.275 (m, 2H), 7.516-7.599 (m, 4H), 8.040 (d, 2H,  $J = 8.4$  Hz);

$^{13}\text{C-NMR}$  (100 MHz,  $\text{DMSO-}d_6$ )  $\delta$ (ppm): 50.621, 59.853, 122.489, 123.629, 125.467, 129.145, 129.395, 137.246, 147.135, 147.950, 164.154, 167.084.

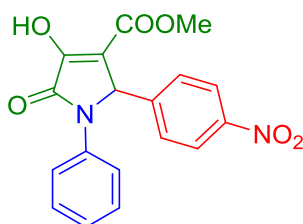

**Methyl 4-hydroxy-5-oxo-1-phenyl-2-(o-tolyl)-2,5-dihydro-1H-pyrrole-3-carboxylate (4e):**

pale yellow solid;

$^1\text{H-NMR}$  (400 MHz,  $\text{DMSO-}d_6$ )  $\delta$ (ppm): 2.555 (s, 3H), 3.579 (s, 3H), 6.260 (s, 1H), 7.000-7.109 (m, 5H), 7.266-7.305 (m, 2H), 7.416-7.561 (m, 2H), 11.684 (s, 1H);

$^{13}\text{C-NMR}$  (100 MHz,  $\text{DMSO-}d_6$ )  $\delta$ (ppm): 19.520, 51.592, 57.046, 113.167, 123.287, 125.276, 126.133, 126.617, 128.007, 129.228, 130.859, 134.953, 136.881, 137.810, 153.269, 163.106, 164.732.

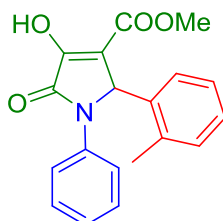

**Methyl 4-hydroxy-2-(4-hydroxy-3-methoxyphenyl)-5-oxo-1-phenyl-2,5-dihydro-1H-pyrrole-3-carboxylate (4f):**

pale yellow solid;

$^1\text{H-NMR}$  (400 MHz,  $\text{DMSO-}d_6$ )  $\delta(\text{ppm})$ : 3.335 (s, 3H), 3.657 (s, 3H), 5.946 (s, 1H), 6.574-6.642 (m, 2H), 6.768 (d, 1H,  $J = 8.0$  Hz), 7.091 (t, 1H,  $J = 7.2$  Hz), 7.269-7.308 (m, 2H), 7.552 (d, 2H,  $J = 8$  Hz), 8.911 (s, 1H), 11.558 (s, 1H);

$^{13}\text{C-NMR}$  (100 MHz,  $\text{DMSO-}d_6$ )  $\delta(\text{ppm})$ : 51.535, 56.100, 60.642, 112.224, 112.506, 115.700, 120.689, 121.478, 123.234, 125.759, 127.270, 128.495, 129.043, 136.840, 146.638, 147.686, 152.715, 163.023, 164.299.

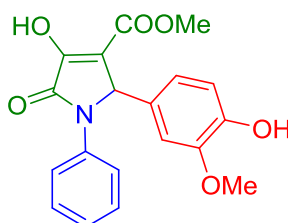

**Methyl 4-hydroxy-2-(4-methoxyphenyl)-5-oxo-1-phenyl-2,5-dihydro-1H-pyrrole-3-carboxylate (4g):**

pale white solid;

$^1\text{H-NMR}$  (400 MHz,  $\text{DMSO-}d_6$ )  $\delta(\text{ppm})$ : 3.566 (s, 3H), 3.623 (s, 3H), 5.994 (s, 1H), 6.742 (d, 2H,  $J = 8.4$  Hz), 7.049-7.152 (m, 3H), 7.246-7.285 (m, 2H), 7.534 (d, 2H,  $J = 8$  Hz);

$^{13}\text{C-NMR}$  (100 MHz,  $\text{DMSO-}d_6$ )  $\delta(\text{ppm})$ : 51.560, 55.347, 60.498, 112.462, 114.110, 123.019, 125.754, 128.483, 129.109, 129.279, 136.710, 152.795, 159.182, 162.966, 164.338.

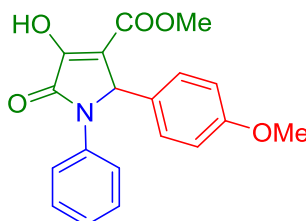

**Methyl 2-(4-chlorophenyl)-4-hydroxy-5-oxo-1-phenyl-2,5-dihydro-1H-pyrrole-3-carboxylate (4h):**

white solid;

$^1\text{H-NMR}$  (400 MHz,  $\text{DMSO-}d_6$ )  $\delta(\text{ppm})$ : 3.511 (s, 3H), 6.022 (s, 1H), 7.060 (t, 1H,  $J = 7.2$  Hz), 7.172-7.328 (m, 6H), 7.540-7.589 (m, 2H);

$^{13}\text{C-NMR}$  (100 MHz,  $\text{DMSO-}d_6$ )  $\delta(\text{ppm})$ : 51.204, 60.173, 109.223, 122.851, 125.738, 128.612, 129.137, 129.983, 132.565, 136.825, 137.310, 156.909, 163.769, 165.740.

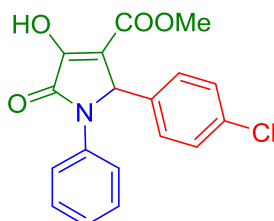

**Methyl 4-hydroxy-2-(naphthalen-2-yl)-5-oxo-1-phenyl-2,5-dihydro-1H-pyrrole-3-carboxylate (4i):**

white solid;

$^1\text{H-NMR}$  (400 MHz,  $\text{DMSO-}d_6$ )  $\delta$ (ppm): 3.539 (s, 3H), 6.228 (s, 1H), 6.997-7.034 (m, 1H), 7.216-7.274 (m, 3H), 7.426-7.448 (m, 2H), 7.597 (d, 2H,  $J = 7.6$  Hz), 7.720-7.785 (m, 2H), 7.831-7.854 (m, 1H), 11.848 (s, 1H);

$^{13}\text{C-NMR}$  (100 MHz,  $\text{DMSO-}d_6$ )  $\delta$ (ppm): 51.589, 61.185, 112.229, 123.072, 124.878, 125.871, 126.691, 127.940, 128.197, 128.473, 129.127, 133.052, 134.415, 136.703, 153.224, 162.991, 164.485.

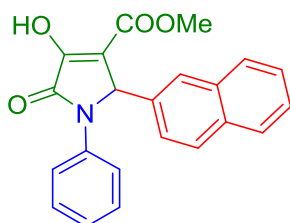

**Methyl 4-hydroxy-1-(2-methoxyphenyl)-5-oxo-2-phenyl-2,5-dihydro-1H-pyrrole-3-carboxylate (5a):**

pale white solid;

$^1\text{H-NMR}$  (400 MHz,  $\text{DMSO-}d_6$ )  $\delta$ (ppm): 3.565 (s, 3H), 3.755 (s, 3H), 5.742 (s, 1H), 6.761-6.834 (m, 1H), 7.006-7.213 (m, 8H);

$^{13}\text{C-NMR}$  (100 MHz,  $\text{DMSO-}d_6$ )  $\delta$ (ppm): 51.536, 55.649, 56.170, 62.562, 111.023, 112.105, 112.844, 114.304, 116.674, 120.699, 121.305, 124.496, 128.125, 128.468, 128.606, 129.407, 136.684, 153.839, 155.162, 163.047, 164.419.

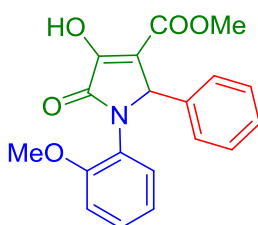

**Methyl 4-hydroxy-5-oxo-2-phenyl-1-(p-tolyl)-2,5-dihydro-1H-pyrrole-3-carboxylate (5b):**

pale yellow solid;

$^1\text{H-NMR}$  (400 MHz,  $\text{DMSO-}d_6$ )  $\delta$ (ppm): 2.232 (s, 3H), 3.597 (s, 3H), 6.014 (s, 1H), 7.070 (d, 2H,  $J = 8.4$  Hz), 7.127-7.239 (m, 5H), 7.427 (d, 2H,  $J = 8.4$  Hz), 11.723 (s, 1H);

$^{13}\text{C-NMR}$  (100 MHz,  $\text{DMSO-}d_6$ )  $\delta$ (ppm): 20.874, 51.530, 61.122, 112.234, 122.998, 128.102, 128.343, 128.712, 129.588, 134.189, 135.125, 137.033, 153.138, 162.939, 164.261.

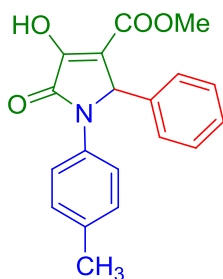

**Methyl 4-hydroxy-5-oxo-2-phenyl-1-(1H-1,2,4-triazol-3-yl)-2,5-dihydro-1H-pyrrole-3-carboxylate (5c):**

white solid;

$^1\text{H-NMR}$  (400 MHz,  $\text{DMSO-}d_6$ )  $\delta$ (ppm): 3.526 (s, 3H), 6.350 (s, 1H), 7.209-7.369 (m, 5H), 7.718 (s, 1H), 11.689 (s, 1H);

$^{13}\text{C-NMR}$  (100 MHz,  $\text{DMSO-}d_6$ )  $\delta$ (ppm): 52.253, 53.656, 59.317, 98.725, 127.375, 128.854, 129.135, 139.934, 141.102, 146.795, 151.028, 163.670, 164.415.

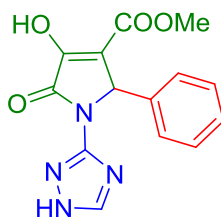

**Methyl 4-hydroxy-5-oxo-2-phenyl-1-(1H-tetrazol-5-yl)-2,5-dihydro-1H-pyrrole-3-carboxylate (5d):**

white solid;

$^1\text{H-NMR}$  (400 MHz,  $\text{DMSO-}d_6$ )  $\delta$ (ppm): 3.535 (s, 3H), 6.761 (s, 1H), 7.300-7.415 (m, 5H), 12.232 (s, 1H);

$^{13}\text{C-NMR}$  (100 MHz,  $\text{DMSO-}d_6$ )  $\delta$ (ppm): 52.487, 53.848, 58.784, 99.918, 127.622, 129.452, 139.429, 139.940, 148.604, 163.304, 163.931.

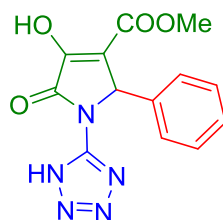

**Ethyl 4-hydroxy-5-oxo-1,2-diphenyl-2,5-dihydro-1H-pyrrole-3-carboxylate (6a):**

white solid;

$^1\text{H-NMR}$  (400 MHz,  $\text{DMSO-}d_6$ )  $\delta$ (ppm): 1.028 (t, 3H,  $J = 7$  Hz), 3.893-3.951 (m, 2H), 5.876 (s, 1H), 7.025-7.258 (m, 8H), 7.555 (d, 2H,  $J = 8$  Hz);

$^{13}\text{C}$ -NMR (100 MHz,  $\text{DMSO-}d_6$ )  $\delta(\text{ppm})$ : 14.601, 58.834, 60.255, 60.781, 122.594, 125.173, 127.690, 128.075, 128.310, 128.969, 137.538, 139.488, 163.745, 166.990.

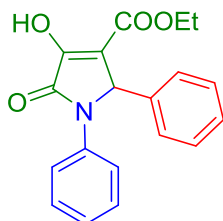

**Ethyl 4-hydroxy-2-(3-nitrophenyl)-5-oxo-1-phenyl-2,5-dihydro-1H-pyrrole-3-carboxylate (6b):**

pale yellow solid;

$^1\text{H}$ -NMR (400 MHz,  $\text{DMSO-}d_6$ )  $\delta(\text{ppm})$ : 1.018 (t, 3H,  $J = 7$  Hz), 3.881-3.973 (m, 2H), 6.123 (s, 1H), 7.006-7.043 (m, 1H), 7.467 (t, 1H,  $J = 8$  Hz), 7.587-7.665 (m, 3H) 7.975 (d, 1H,  $J = 8$  Hz), 8.143 (s, 1H);

$^{13}\text{C}$ -NMR (100 MHz,  $\text{DMSO-}d_6$ )  $\delta(\text{ppm})$ : 14.625, 58.911, 59.771, 122.584, 122.866, 123.245, 125.434, 129.164, 130.013, 134.498, 137.205, 147.819, 163.652.

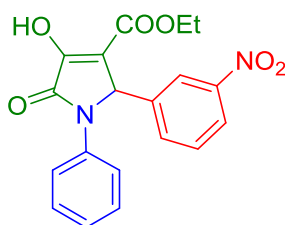

**Ethyl 4-hydroxy-5-oxo-1-phenyl-2-(m-tolyl)-2,5-dihydro-1H-pyrrole-3-carboxylate (6c):**

pale yellow solid;

$^1\text{H}$ -NMR (400 MHz,  $\text{DMSO-}d_6$ )  $\delta(\text{ppm})$ : 1.029 (t, 3H,  $J = 7$  Hz), 2.159 (s, 3H), 3.873-3.936 (m, 2H), 5.807 (s, 1H), 6.880-7.039 (m, 5H), 7.209-7.248 (m, 2H), 7.548 (d, 2H,  $J = 8$  Hz);

$^{13}\text{C}$ -NMR (100 MHz,  $\text{DMSO-}d_6$ )  $\delta(\text{ppm})$ : 14.661, 21.424, 58.727, 60.716, 106.156, 122.498, 125.091, 125.354, 128.149, 128.378, 128.964, 137.204, 137.668, 139.604, 160.324, 163.863, 167.207.

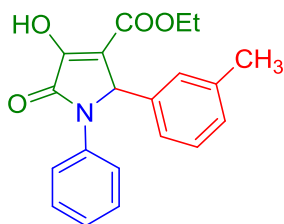

**Ethyl 2-(4-chlorophenyl)-4-hydroxy-5-oxo-1-phenyl-2,5-dihydro-1H-pyrrole-3-carboxylate (6d):**

white solid;



$^1\text{H-NMR}$  (400 MHz,  $\text{DMSO-}d_6$ )  $\delta(\text{ppm})$ : 1.080 (t, 3H,  $J = 7$  Hz), 3.860-4.002 (m, 2H), 5.926 (s, 1H), 7.013-7.050 (m, 1H), 7.172-7.282 (m, 6H), 7.547 (d, 2H,  $J = 8$  Hz);

$^{13}\text{C-NMR}$  (100 MHz,  $\text{DMSO-}d_6$ )  $\delta(\text{ppm})$ : 14.671, 59.001, 60.024, 106.459, 122.644, 125.358, 128.367, 129.047, 130.026, 132.148, 137.289, 138.577, 159.877, 163.741, 166.825.

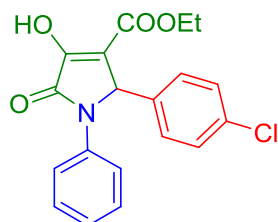

**Ethyl 4-hydroxy-2-(4-methoxyphenyl)-5-oxo-1-phenyl-2,5-dihydro-1H-pyrrole-3-carboxylate (6e):**

pale white solid;

$^1\text{H-NMR}$  (400 MHz,  $\text{DMSO-}d_6$ )  $\delta(\text{ppm})$ : 1.037 (t, 3H,  $J = 7$  Hz), 3.622 (s, 3H), 3.887-3.937 (m, 2H), 5.813 (s, 1H), 6.709 (d, 2H,  $J = 8.4$  Hz), 6.995-7.032 (m, 1H), 7.091-7.115 (m, 2H), 7.210-7.249 (m, 2H), 7.542 (d, 2H,  $J = 8.4$  Hz);

$^{13}\text{C-NMR}$  (100 MHz,  $\text{DMSO-}d_6$ )  $\delta(\text{ppm})$ : 14.749, 55.310, 58.708, 60.224, 113.676, 122.605, 125.021, 128.913, 129.157, 131.310, 137.637, 158.690, 163.866, 167.060.

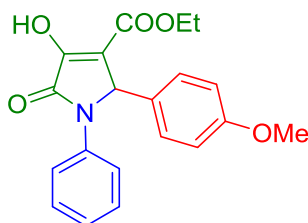

**Ethyl 4-hydroxy-1-(3-nitrophenyl)-5-oxo-2-phenyl-2,5-dihydro-1H-pyrrole-3-carboxylate (7a):**

pale white crystal;

$^1\text{H-NMR}$  (400 MHz,  $\text{DMSO-}d_6$ )  $\delta(\text{ppm})$ : 1.068 (t, 3H,  $J = 7$  Hz), 3.951-4.089 (m, 2H), 6.206 (s, 1H), 7.135-7.238 (m, 3H), 7.315 (d, 2H,  $J = 7.6$  Hz), 7.533-7.574 (m, 1H), 7.895-7.963 (m, 2H), 8.606 (s, 1H), 11.877 (s, 1H);

$^{13}\text{C-NMR}$  (100 MHz,  $\text{DMSO-}d_6$ )  $\delta(\text{ppm})$ : 14.421, 60.284, 60.950, 113.338, 116.765, 120.142, 128.271, 128.633, 128.858, 130.581, 136.381, 137.839, 148.268, 152.542, 162.277, 164.976.

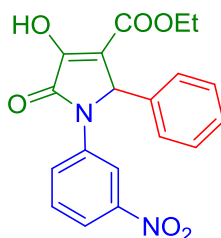

**Ethyl 1-(3-chlorophenyl)-4-hydroxy-5-oxo-2-phenyl-2,5-dihydro-1H-pyrrole-3-carboxylate (7b):**

pale white crystal;

$^1\text{H-NMR}$  (400 MHz,  $\text{DMSO-}d_6$ )  $\delta$ (ppm): 1.058 (t, 3H,  $J = 7$  Hz), 3.952-4.059 (m, 2H), 6.097 (s, 1H), 7.110-7.303 (m, 7H), 7.508 (d, 1H,  $J = 8$  Hz) 7.747 (s, 1H) 11.783 (s, 1H);

$^{13}\text{C-NMR}$  (100 MHz,  $\text{DMSO-}d_6$ )  $\delta$ (ppm): 14.428, 60.210, 60.920, 113.036, 121.151, 122.406, 125.548, 128.211, 128.502, 128.755, 130.744, 133.469, 136.673, 138.129, 152.724, 162.326, 164.659.

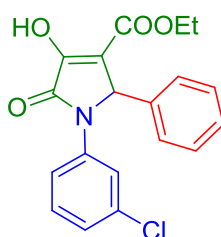

**IV. Scanned copy of NOSEY NMR spectra of inclusion complex of aldehydes and  $\beta$ -CD**

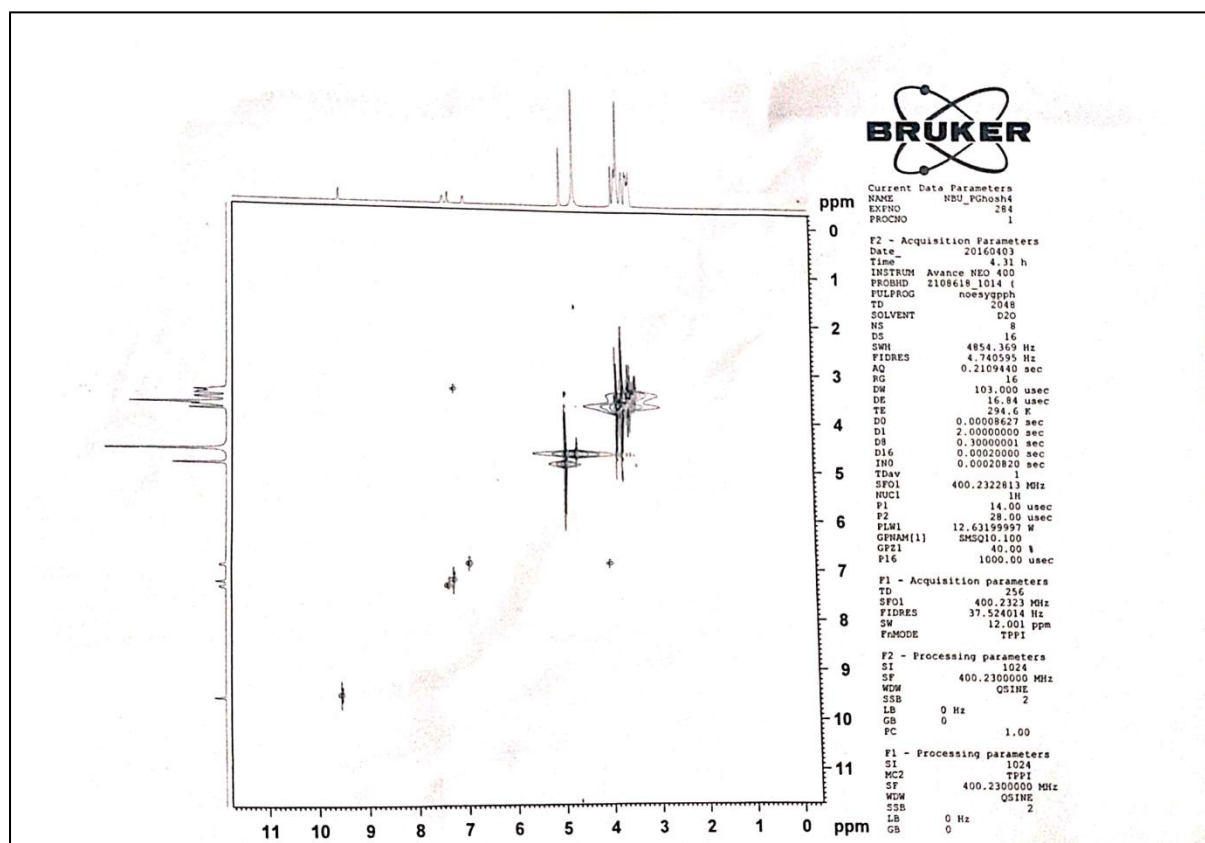

## V. Scanned copies of the $^1\text{H}$ , $^{13}\text{C}$ and $^{19}\text{F}$ NMR of synthesised derivatives

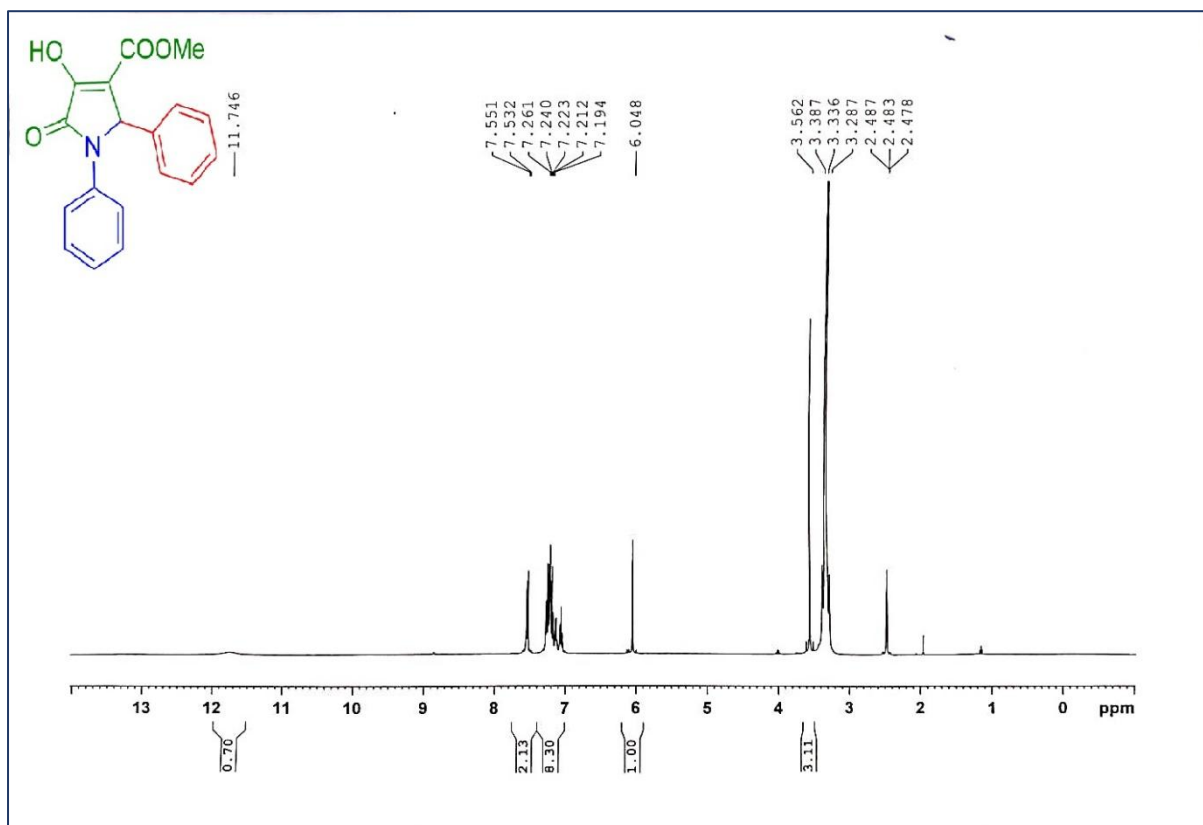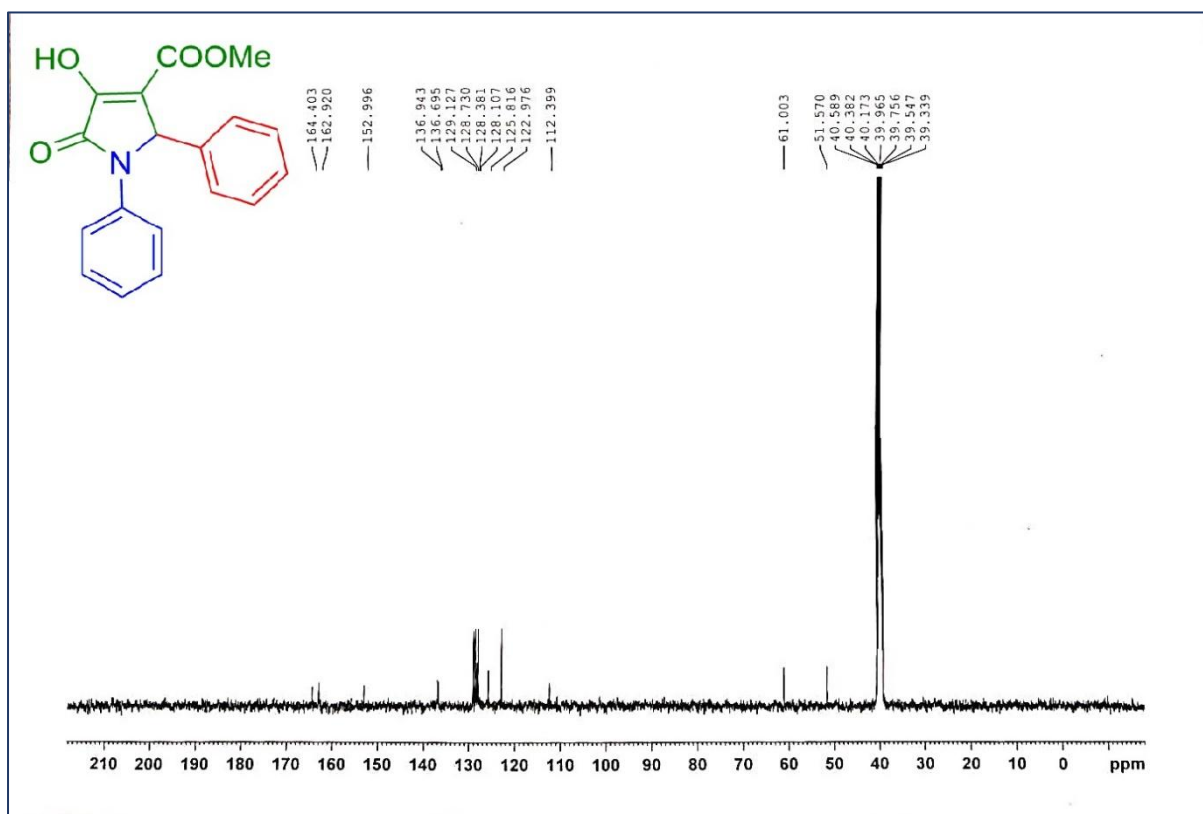

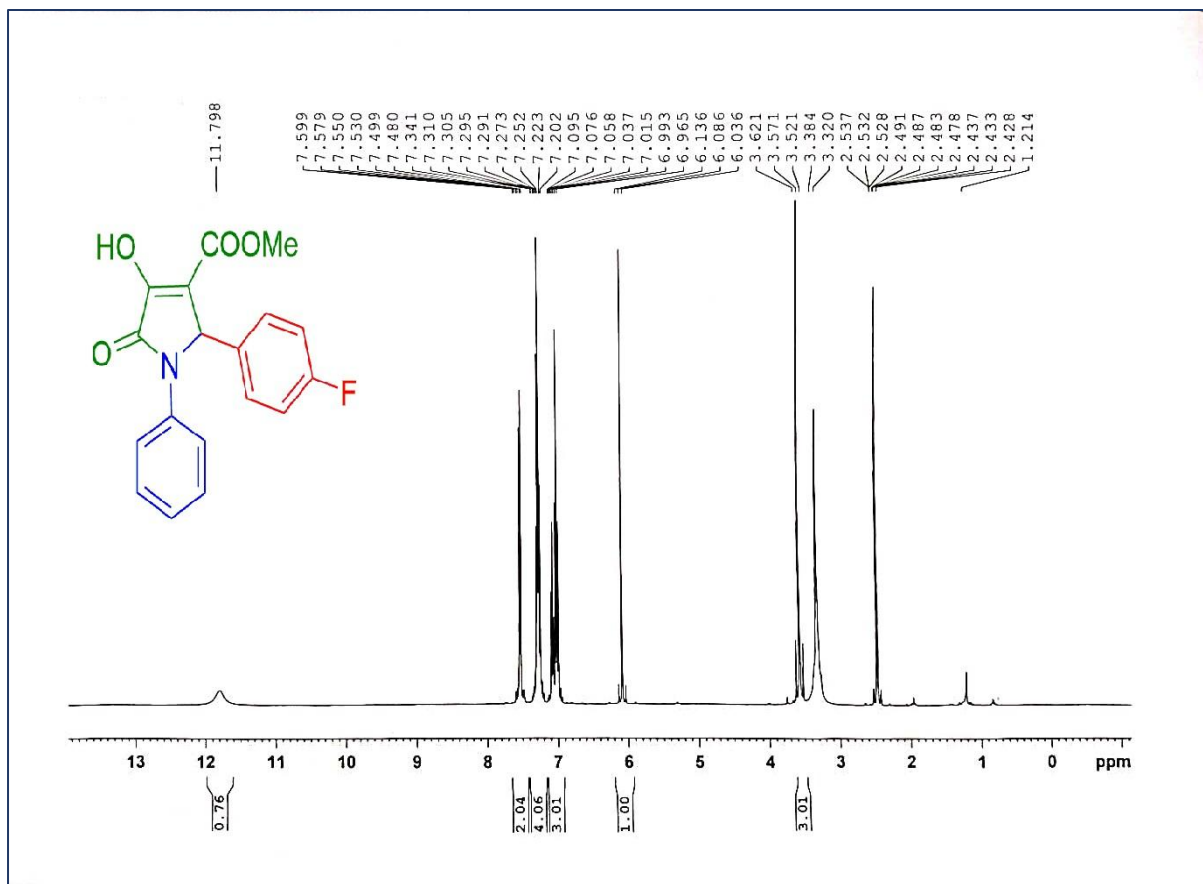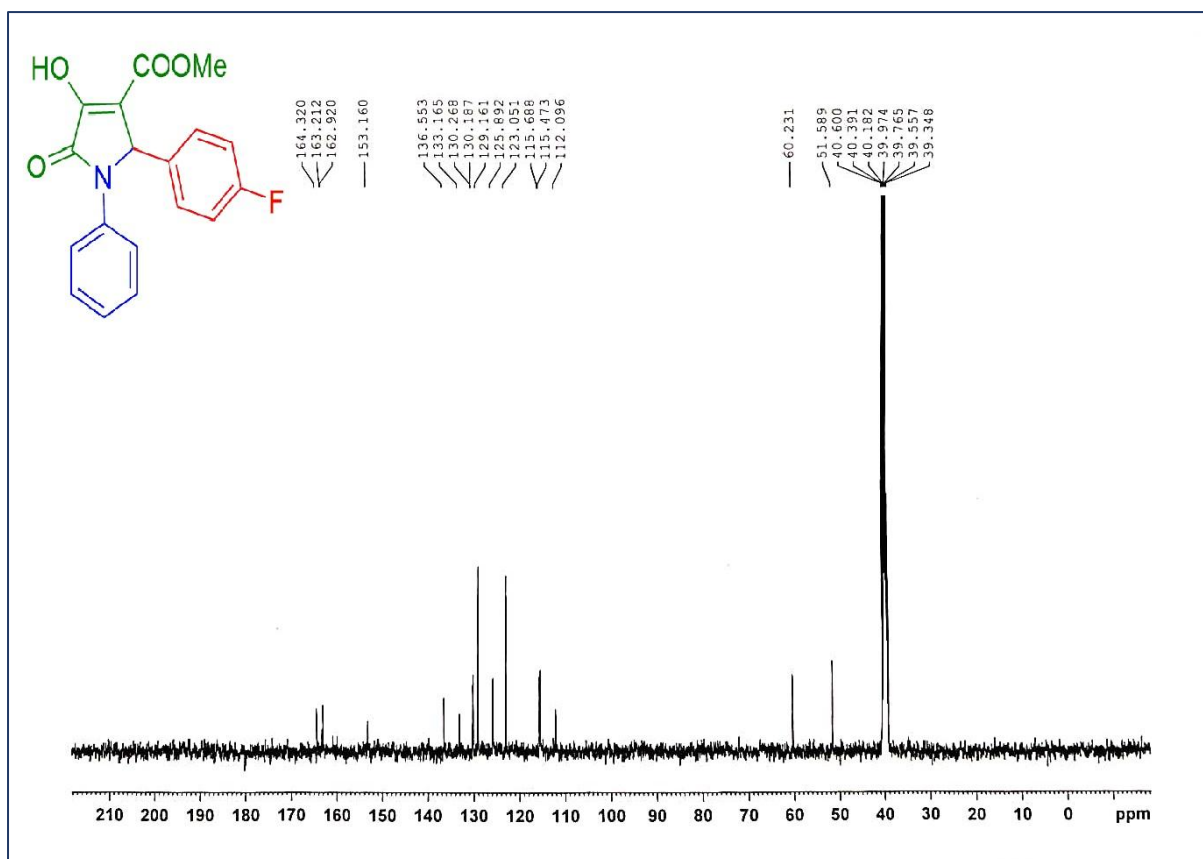

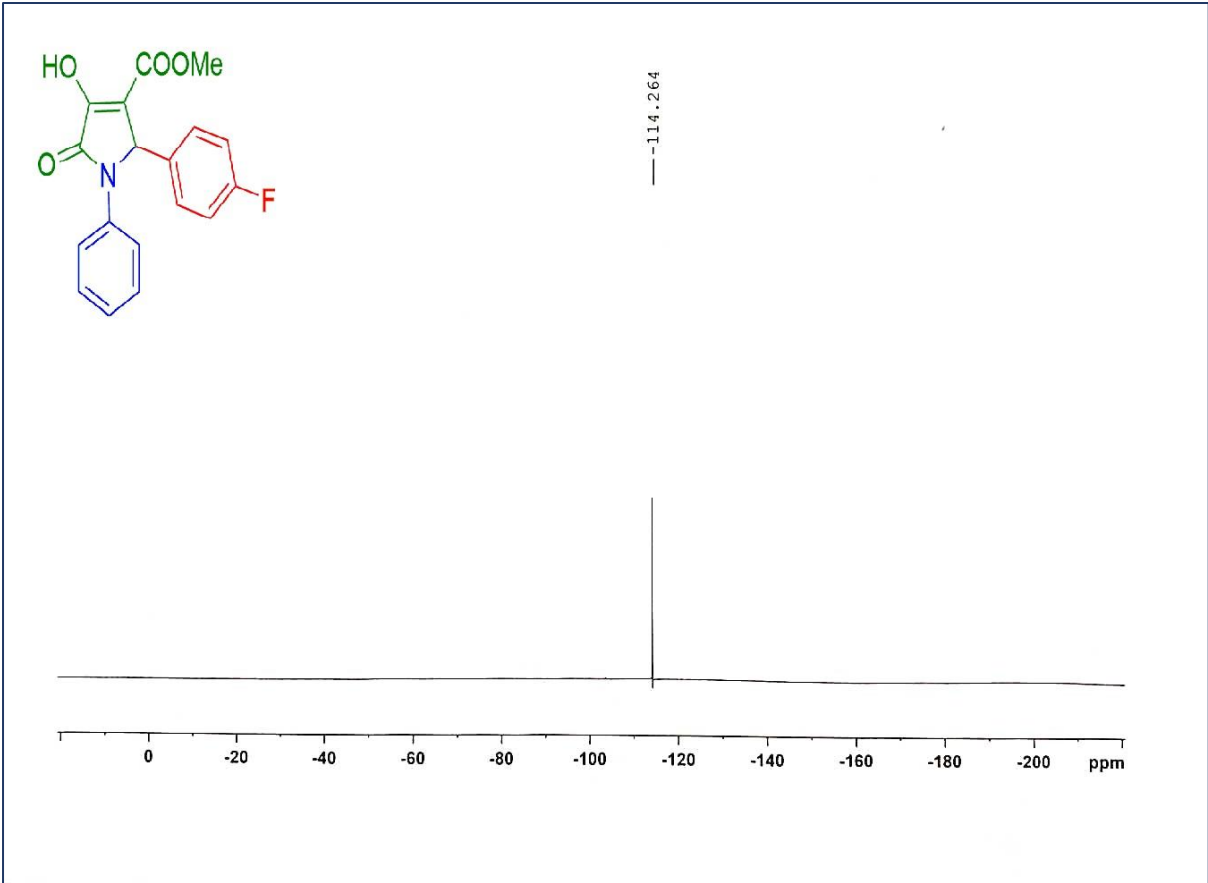

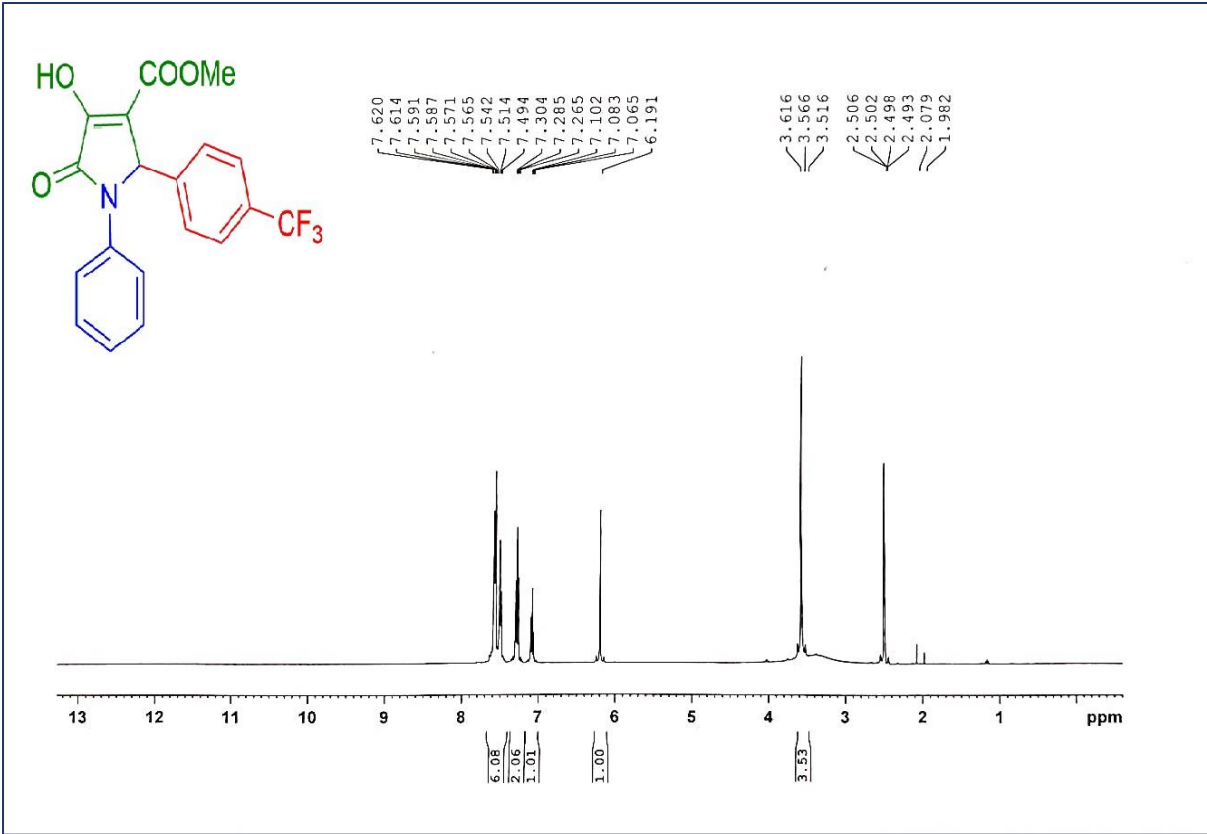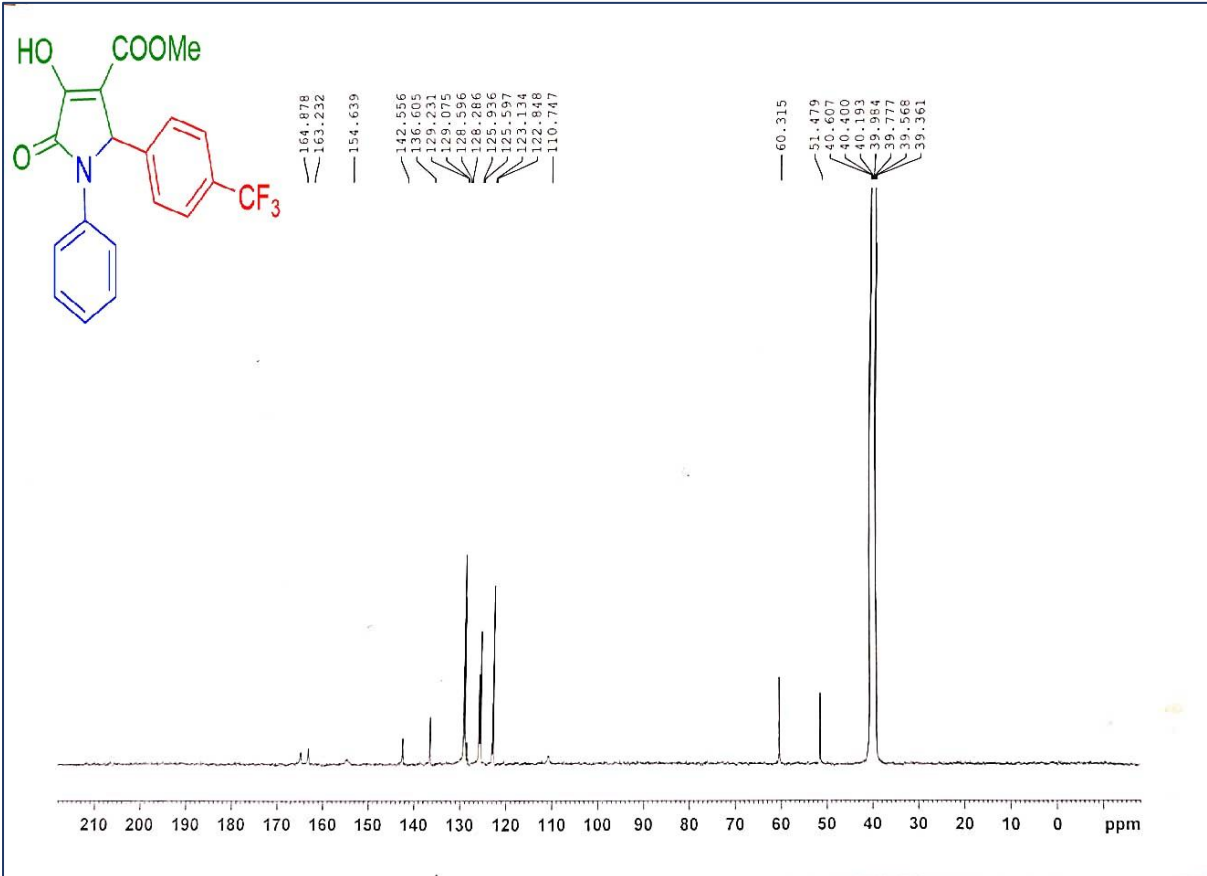

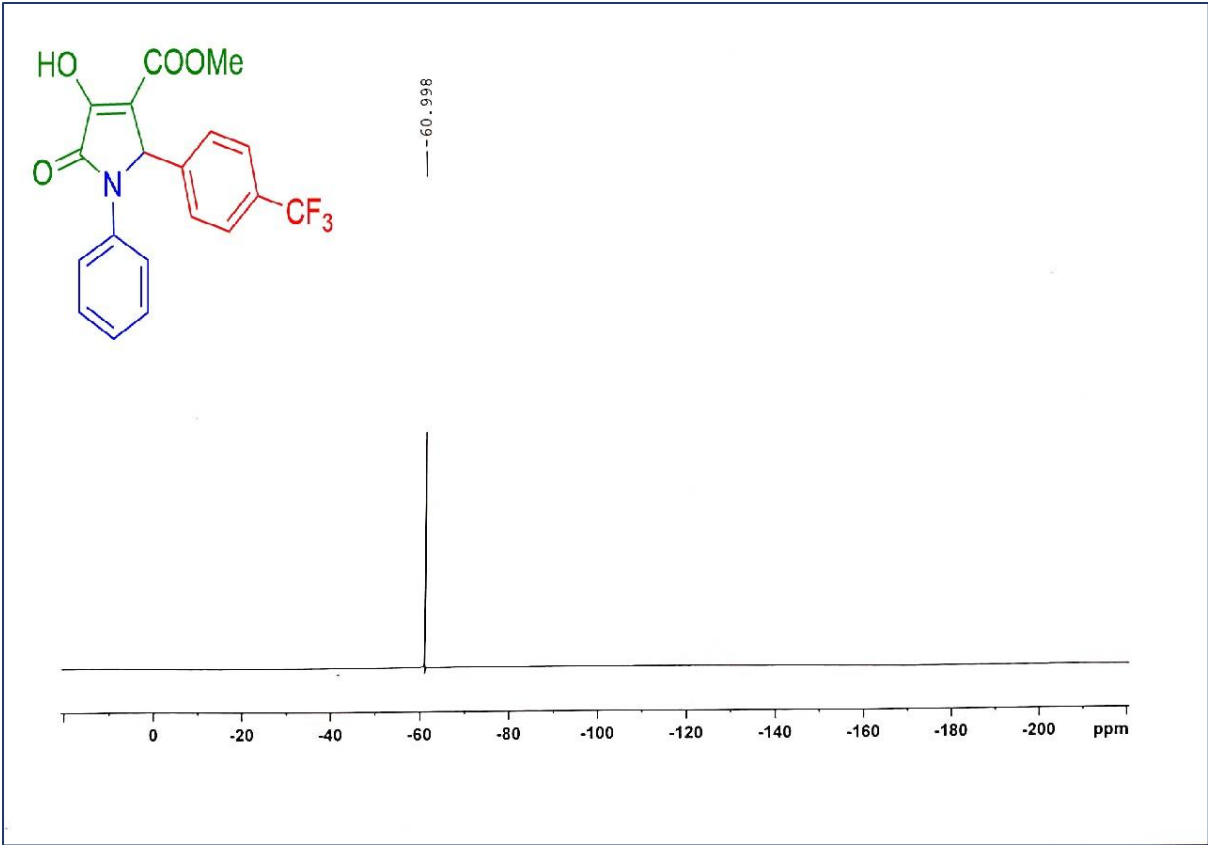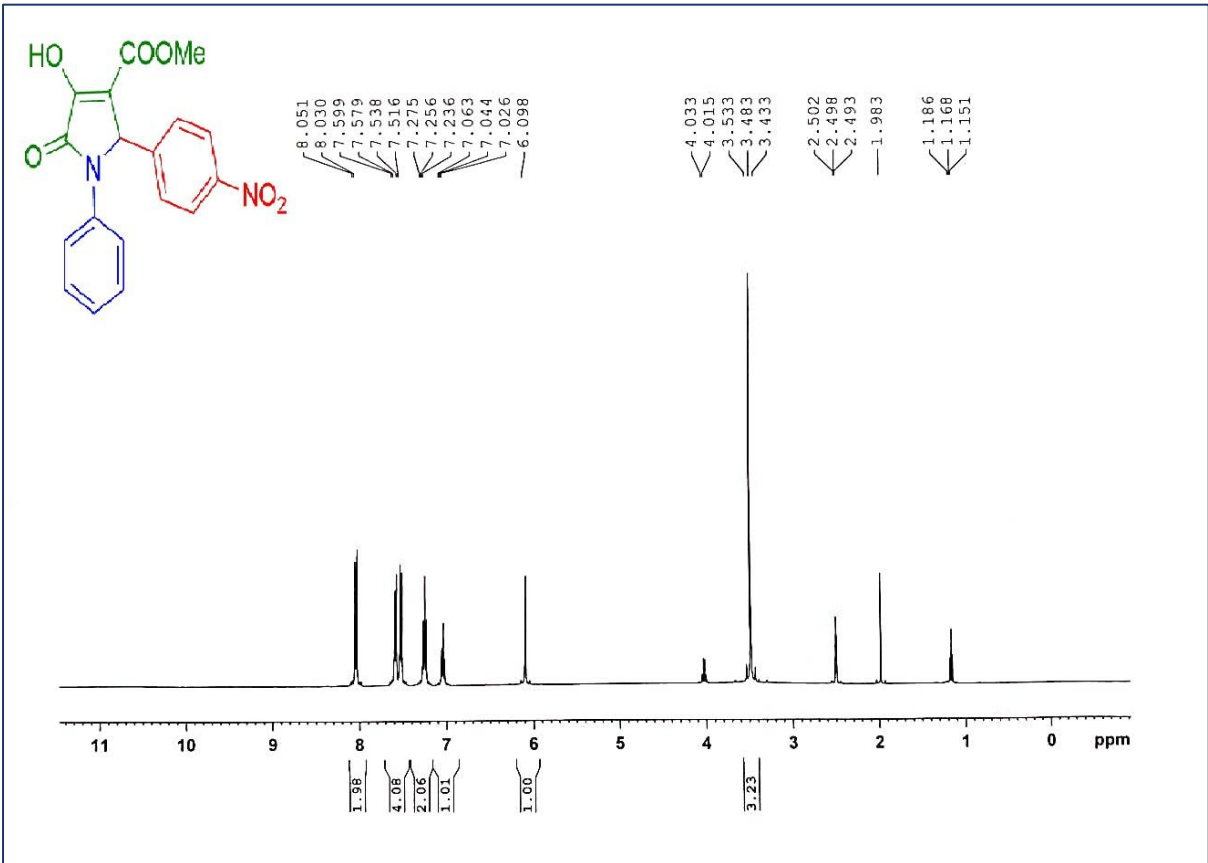

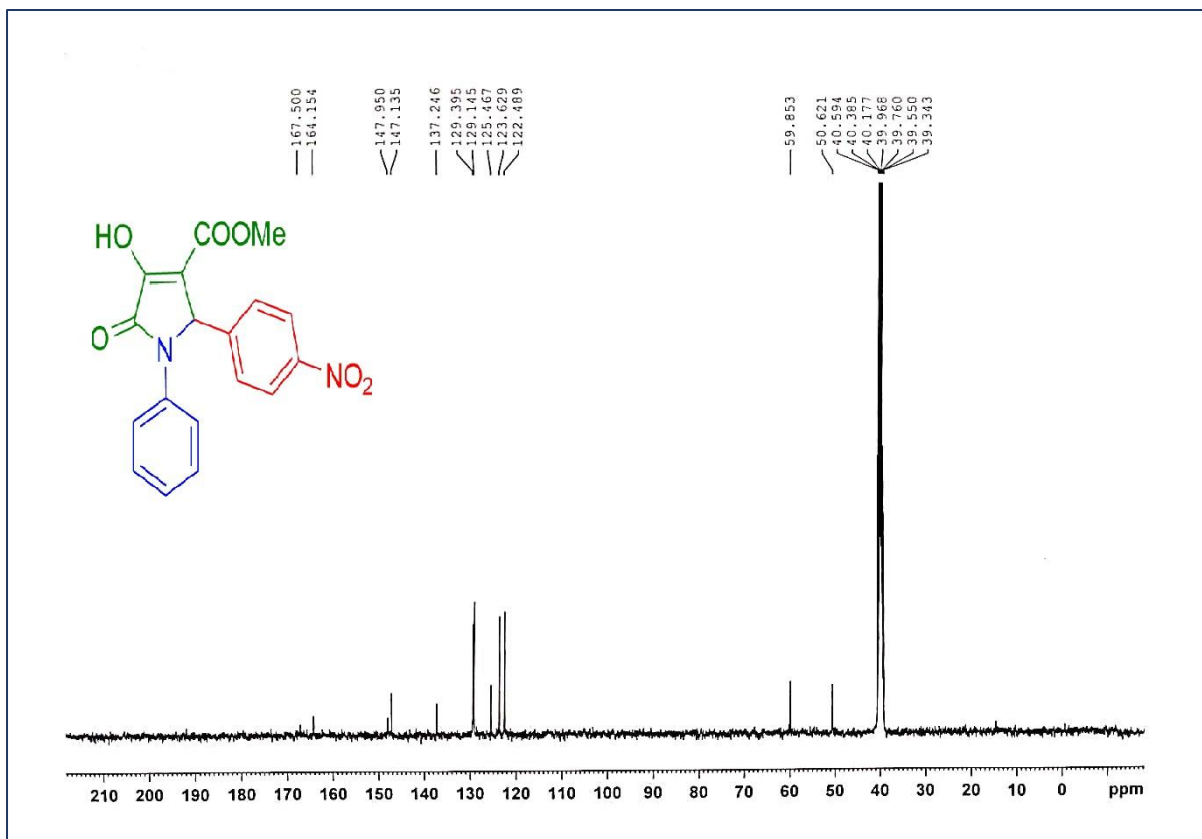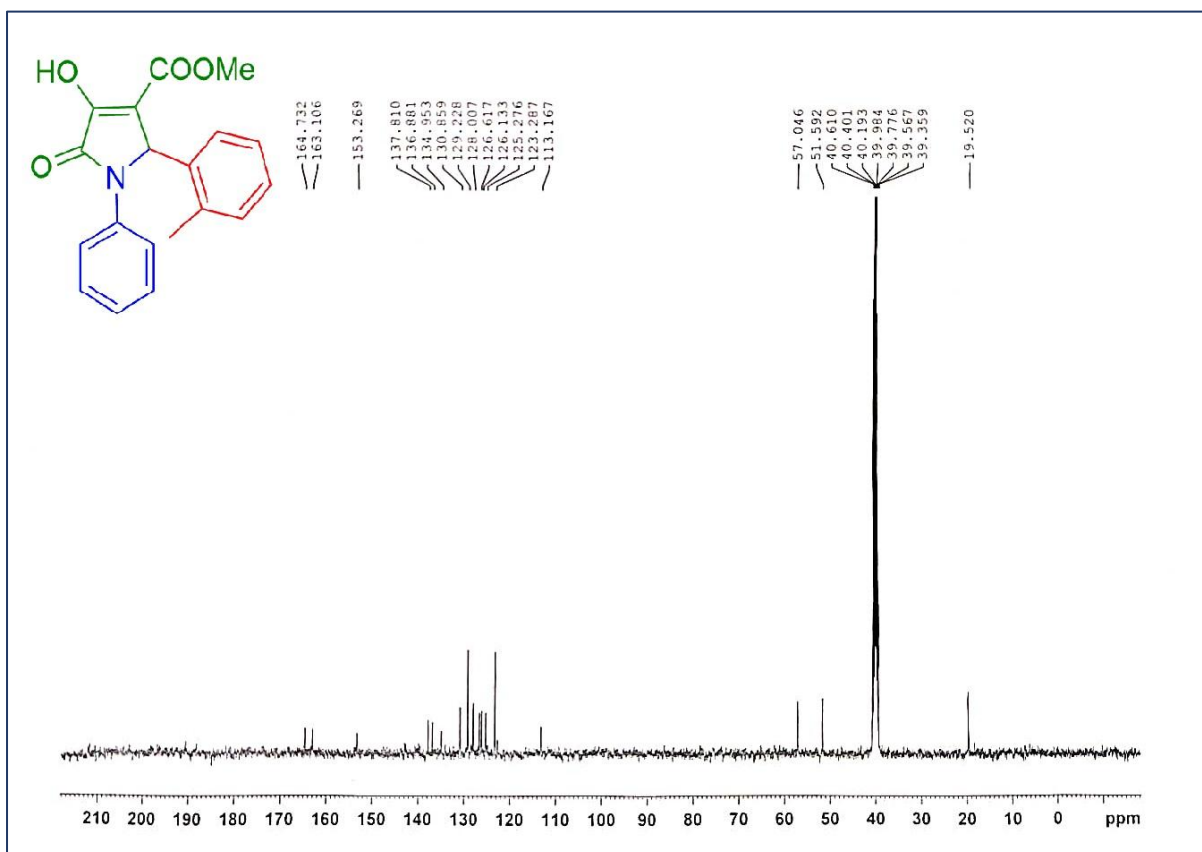



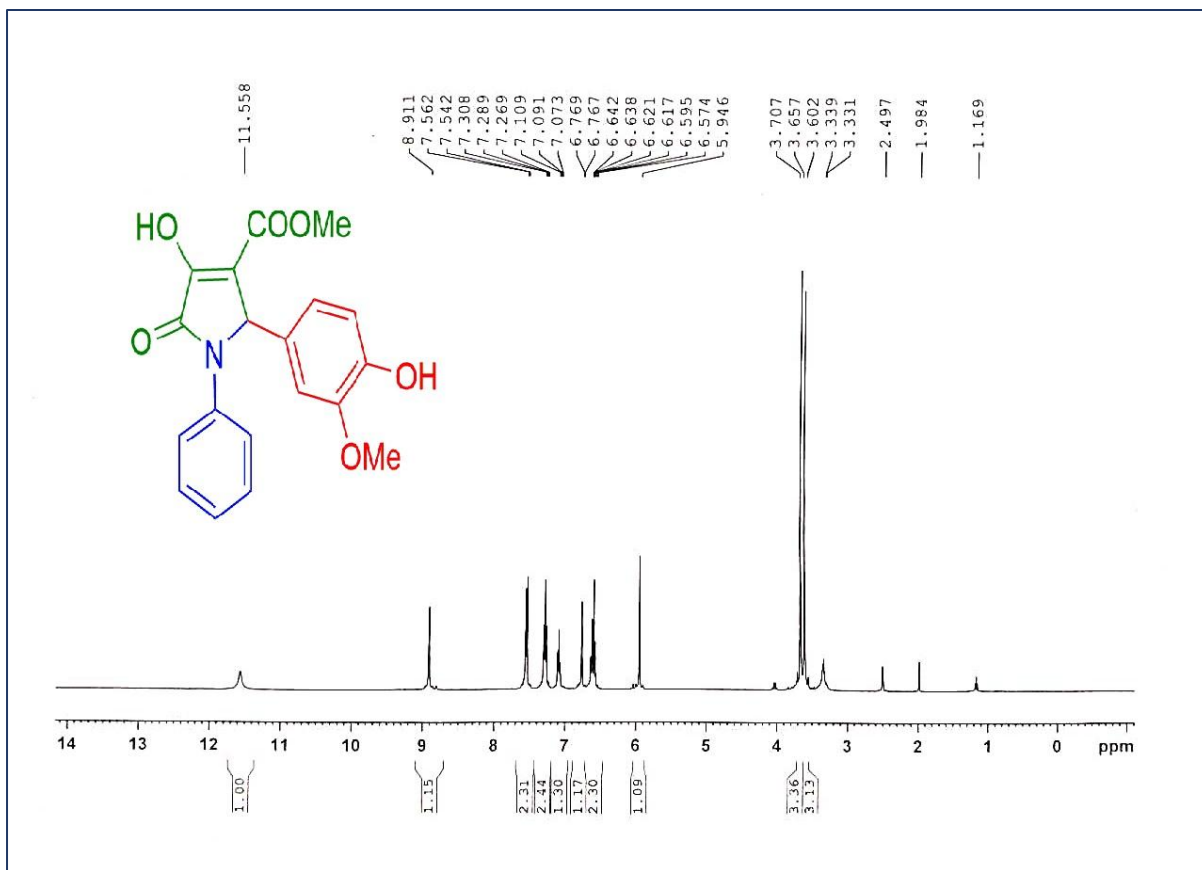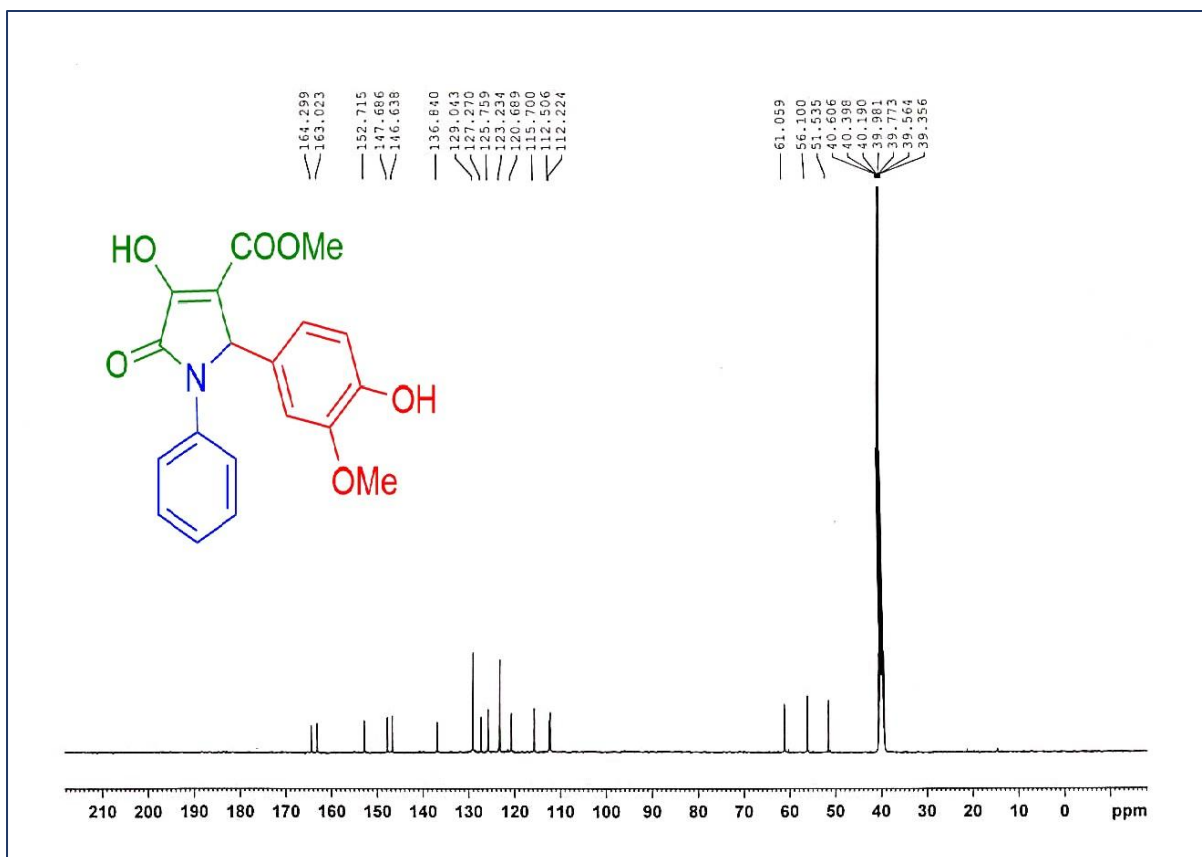

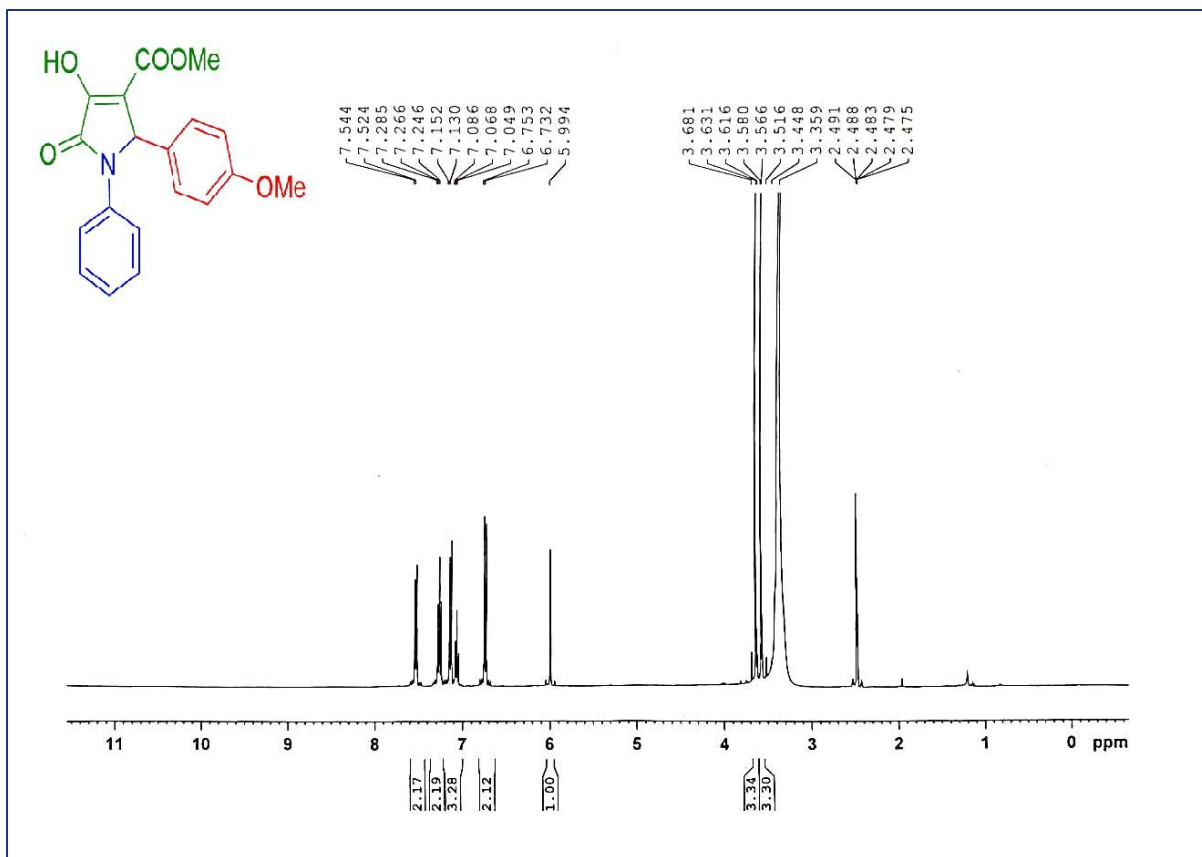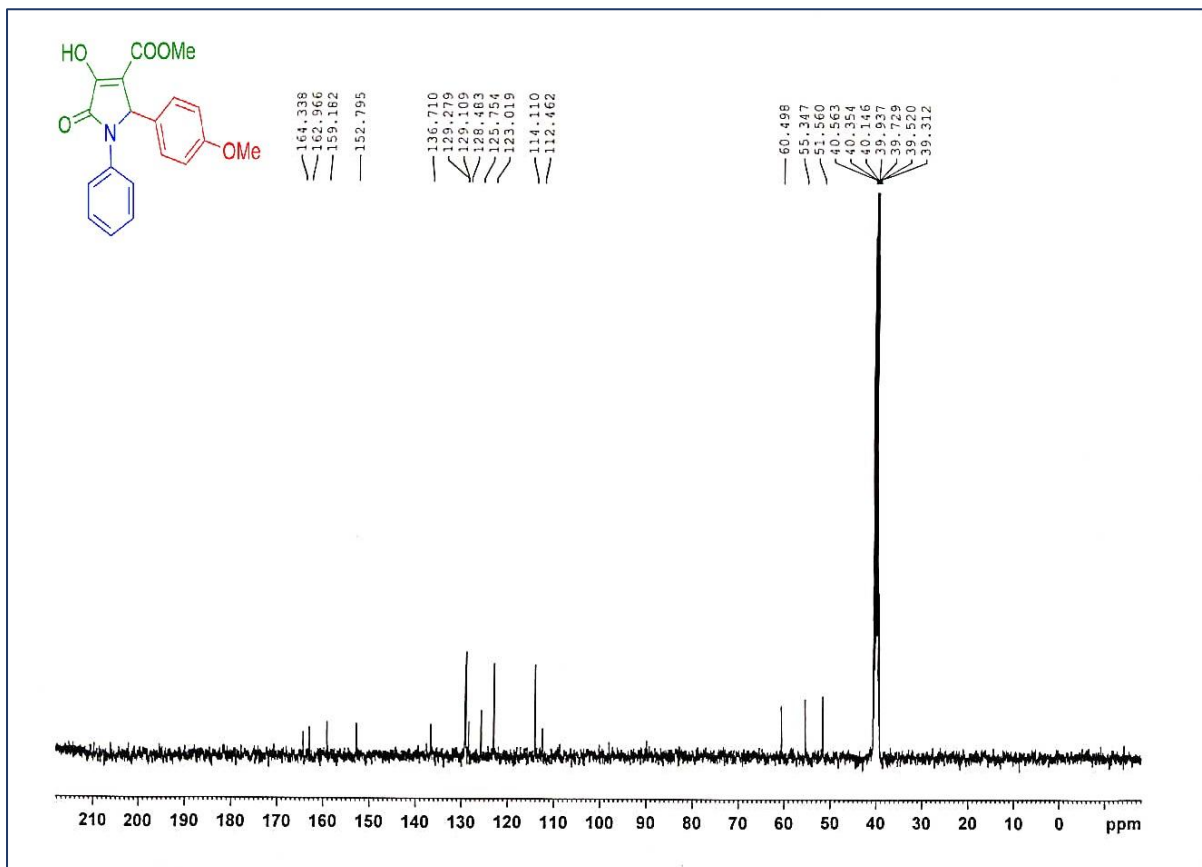

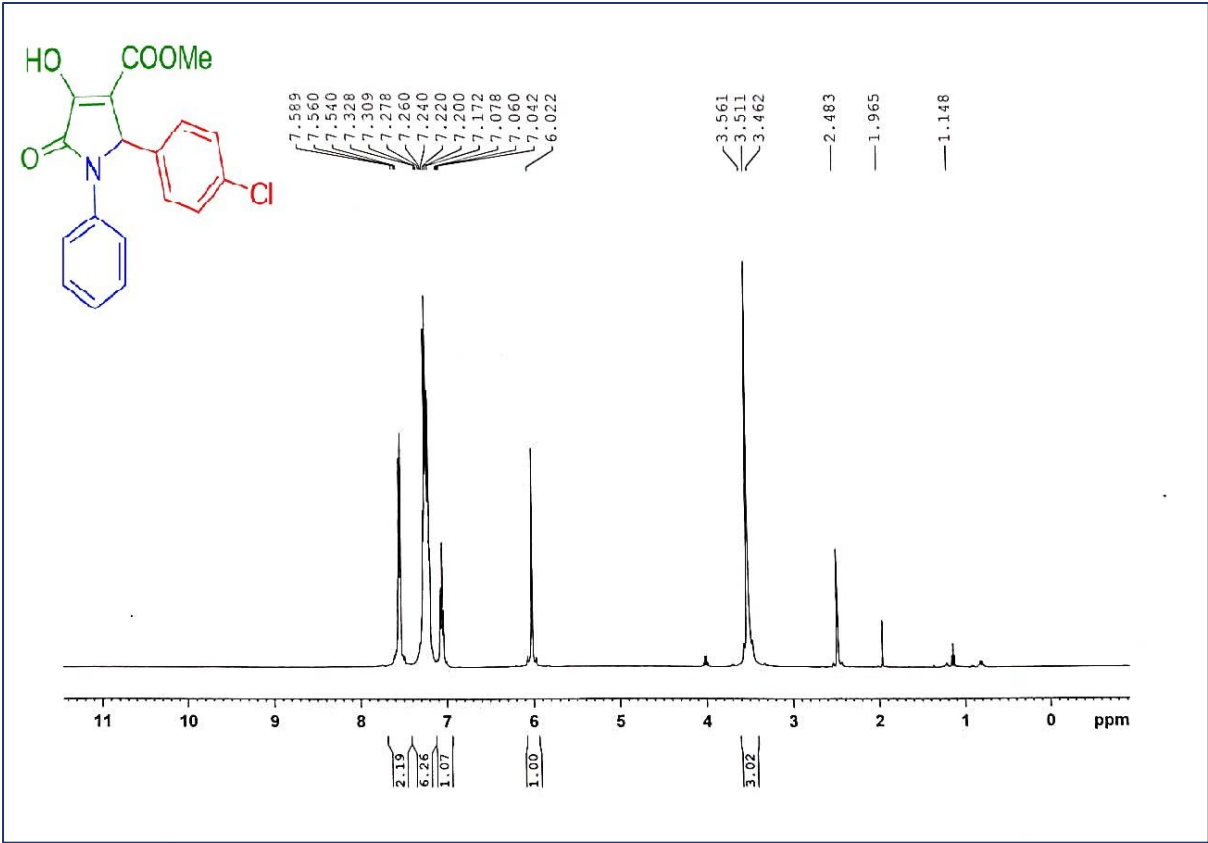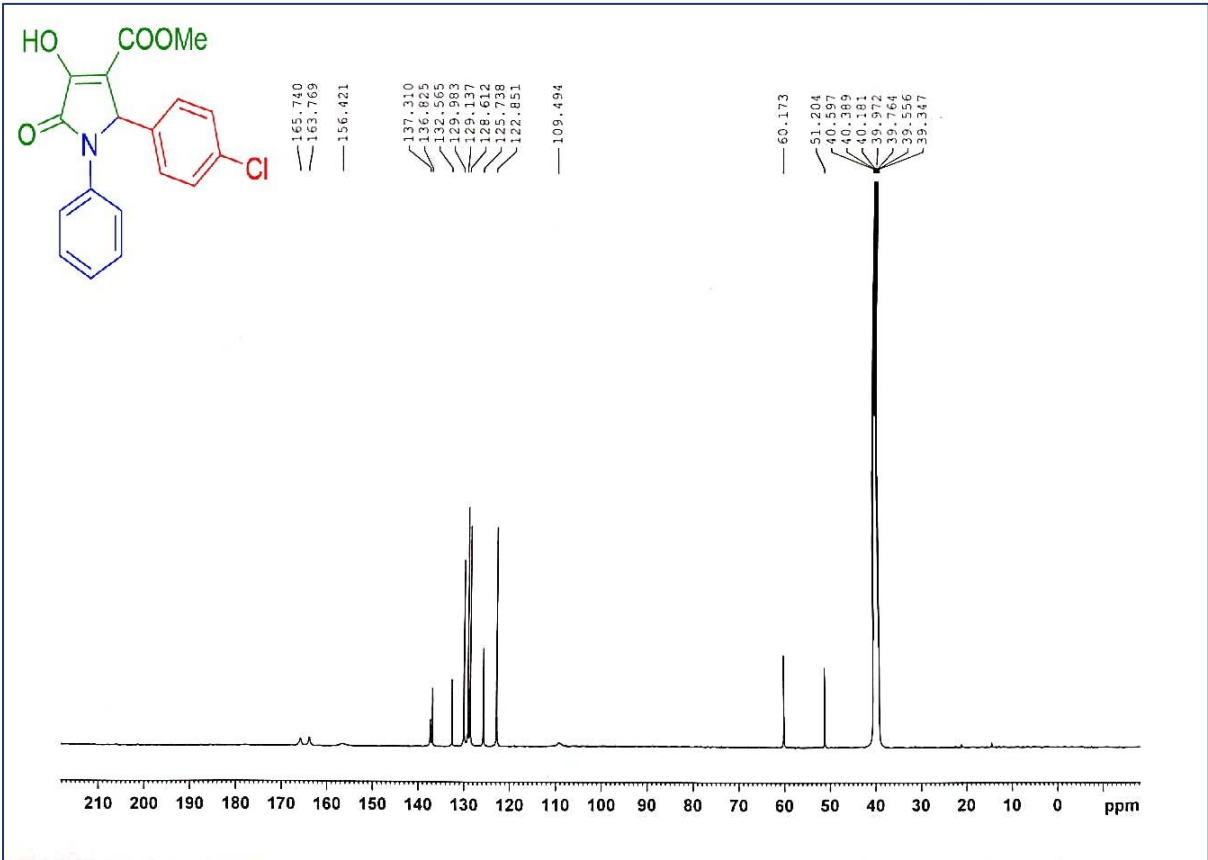

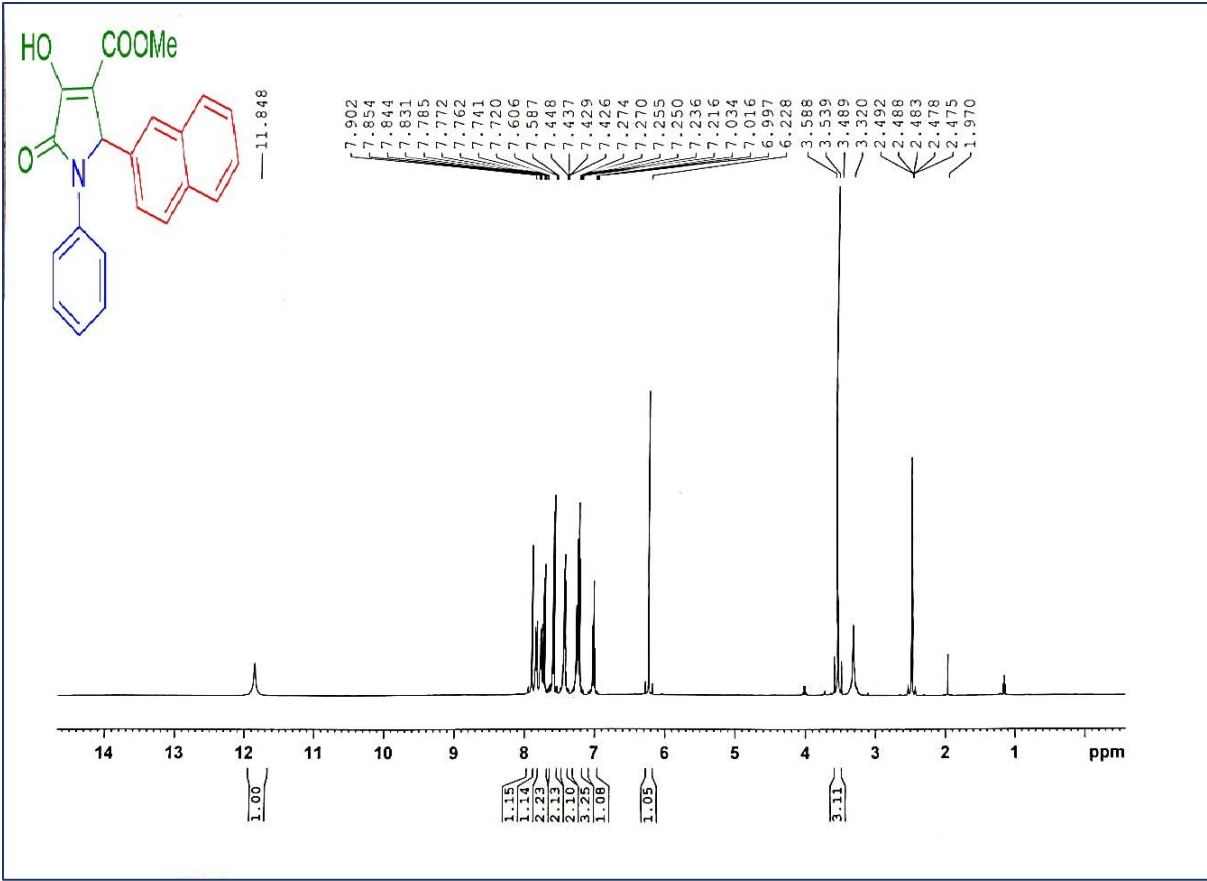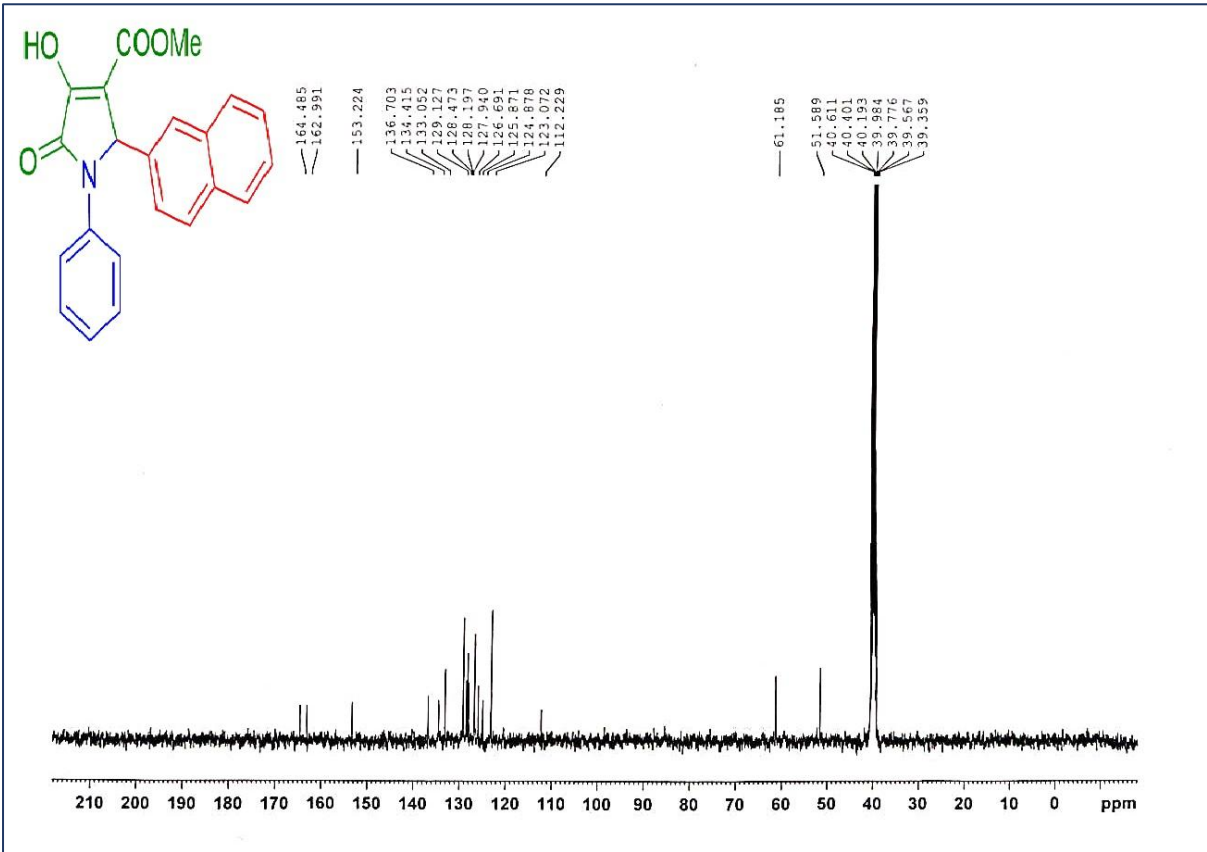

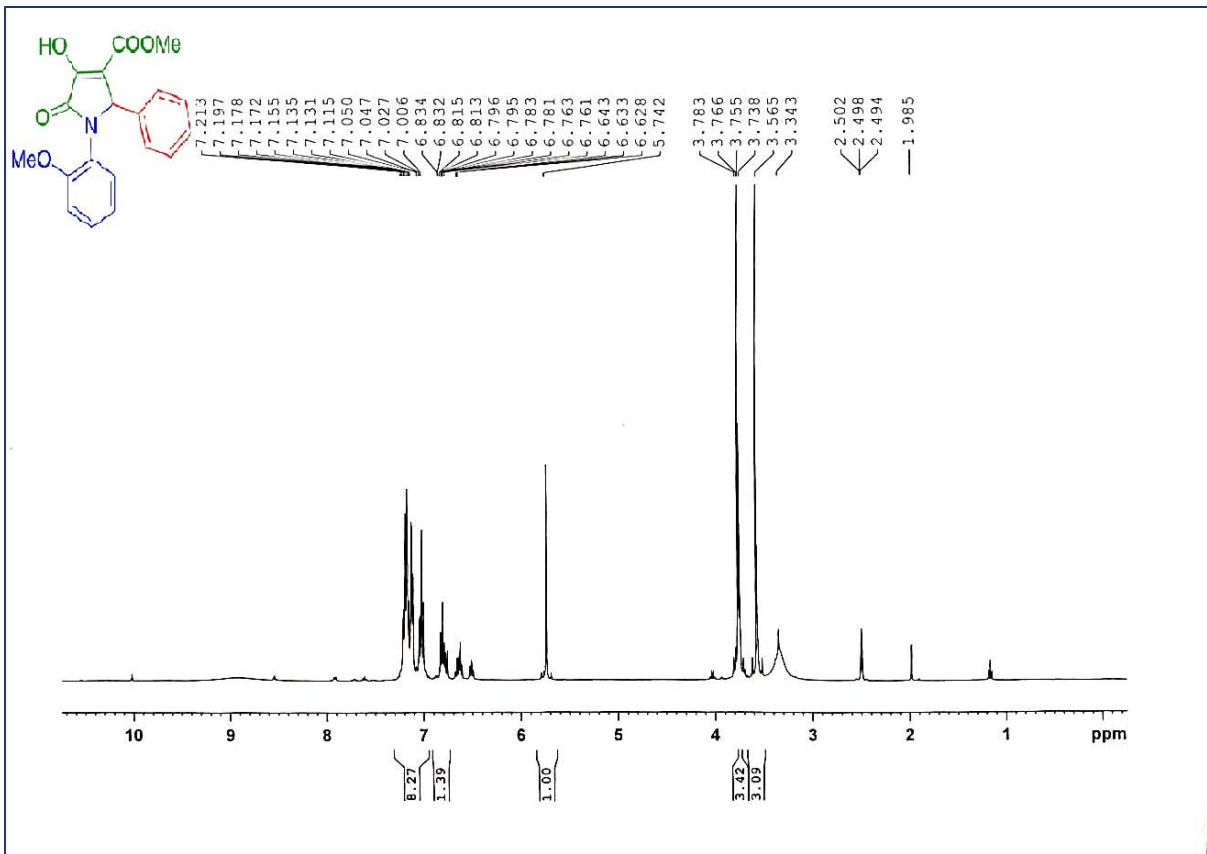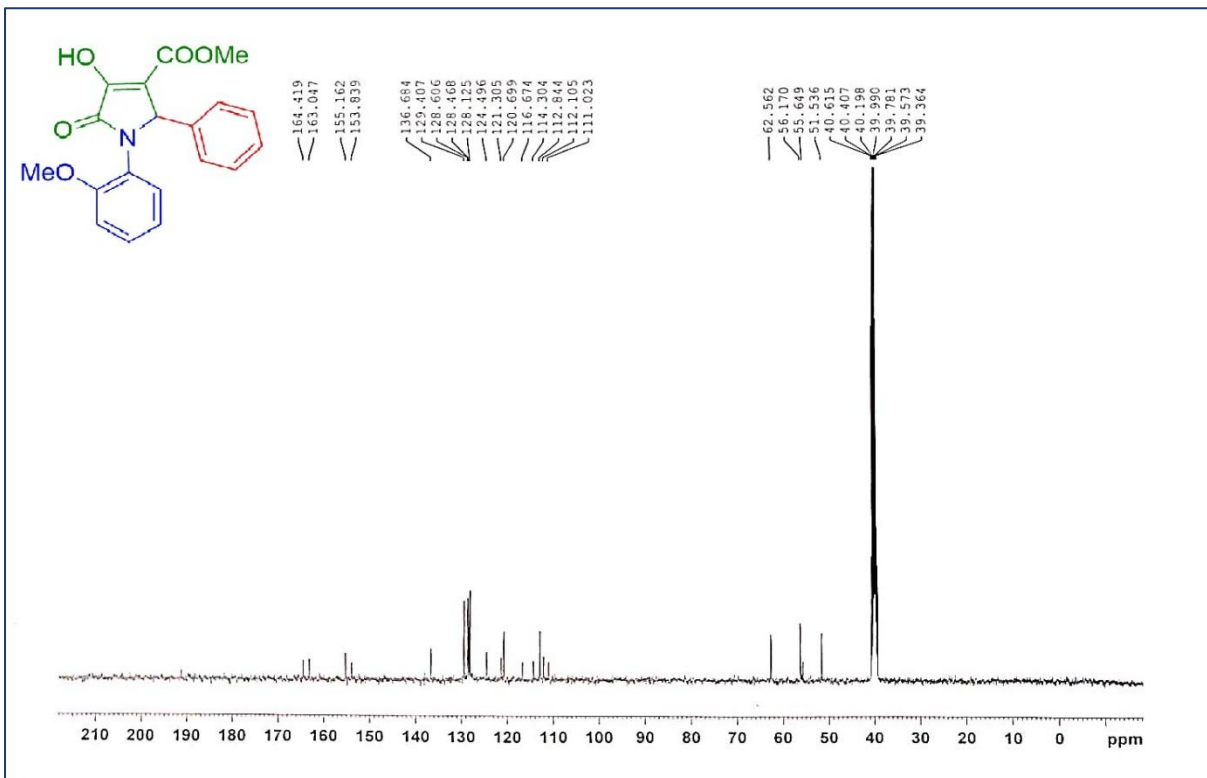

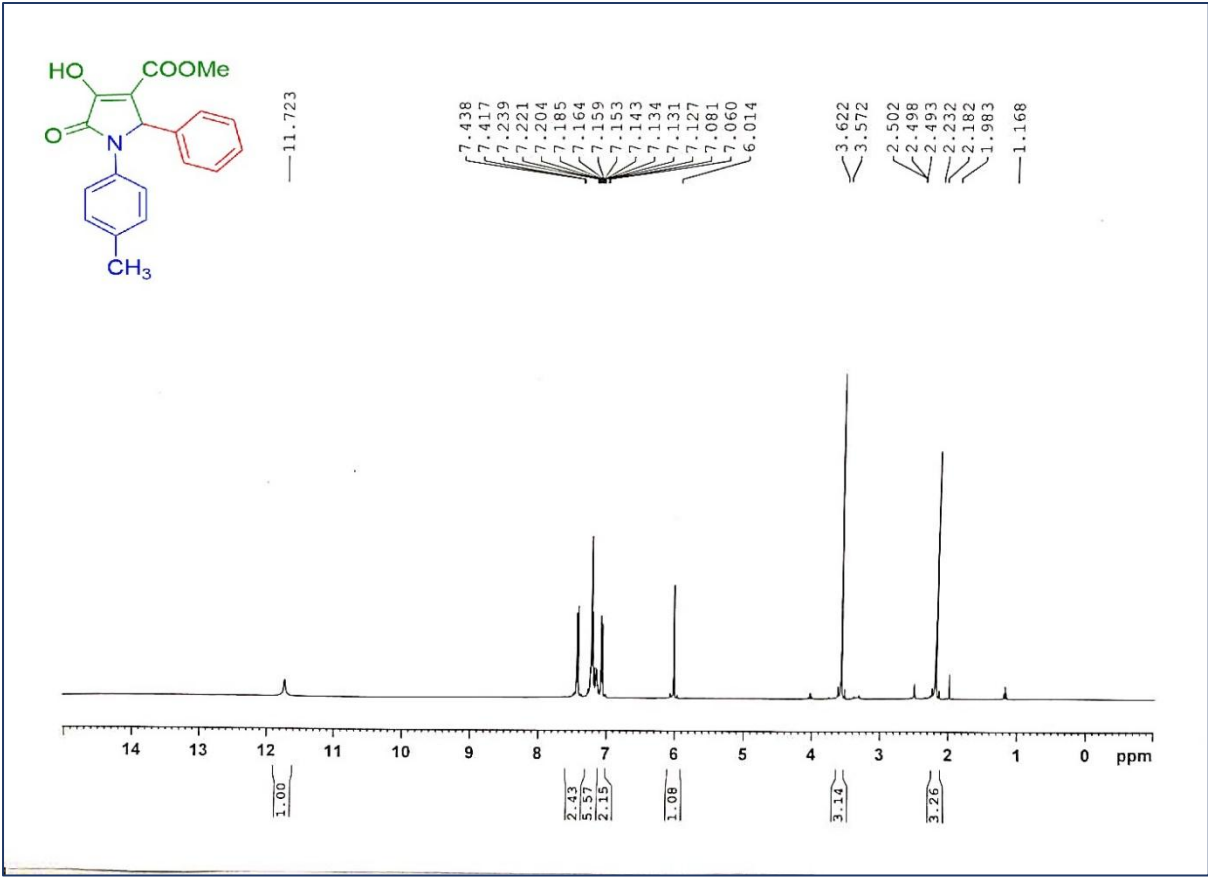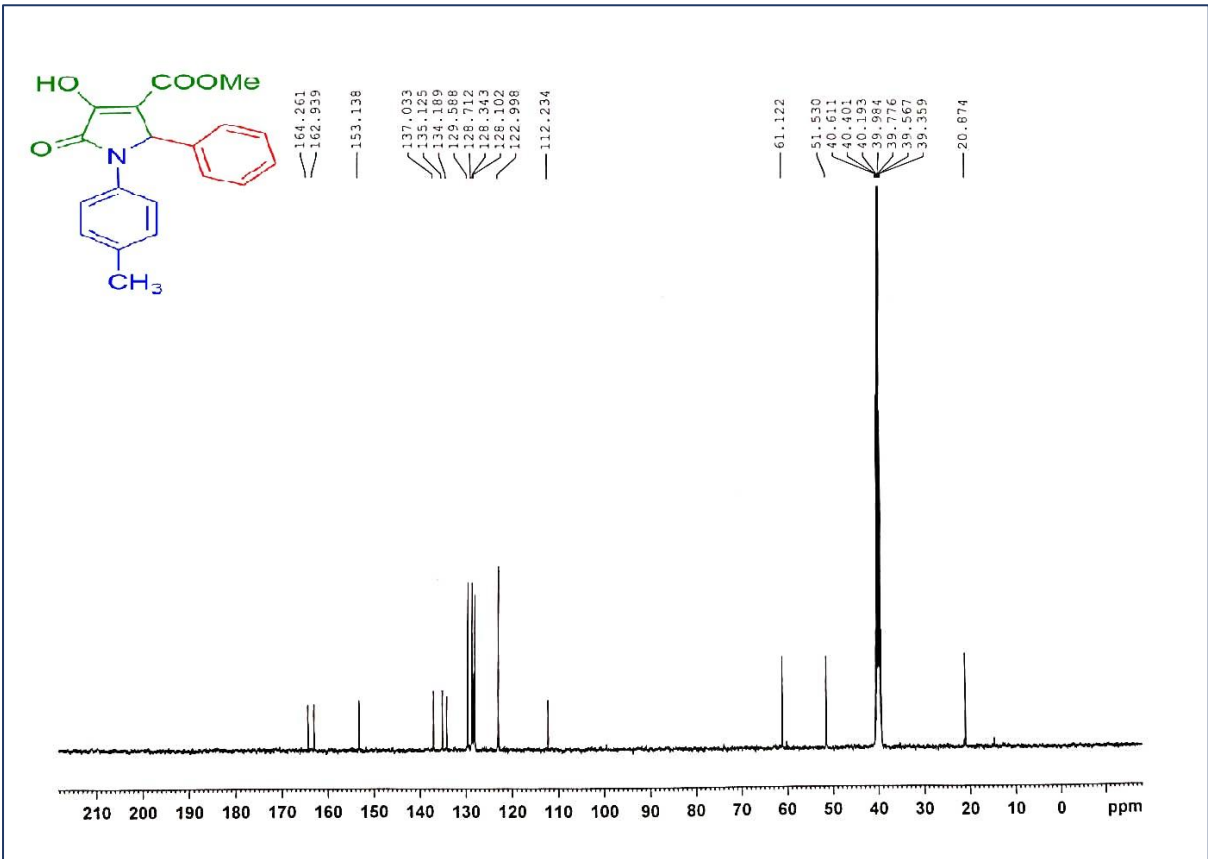

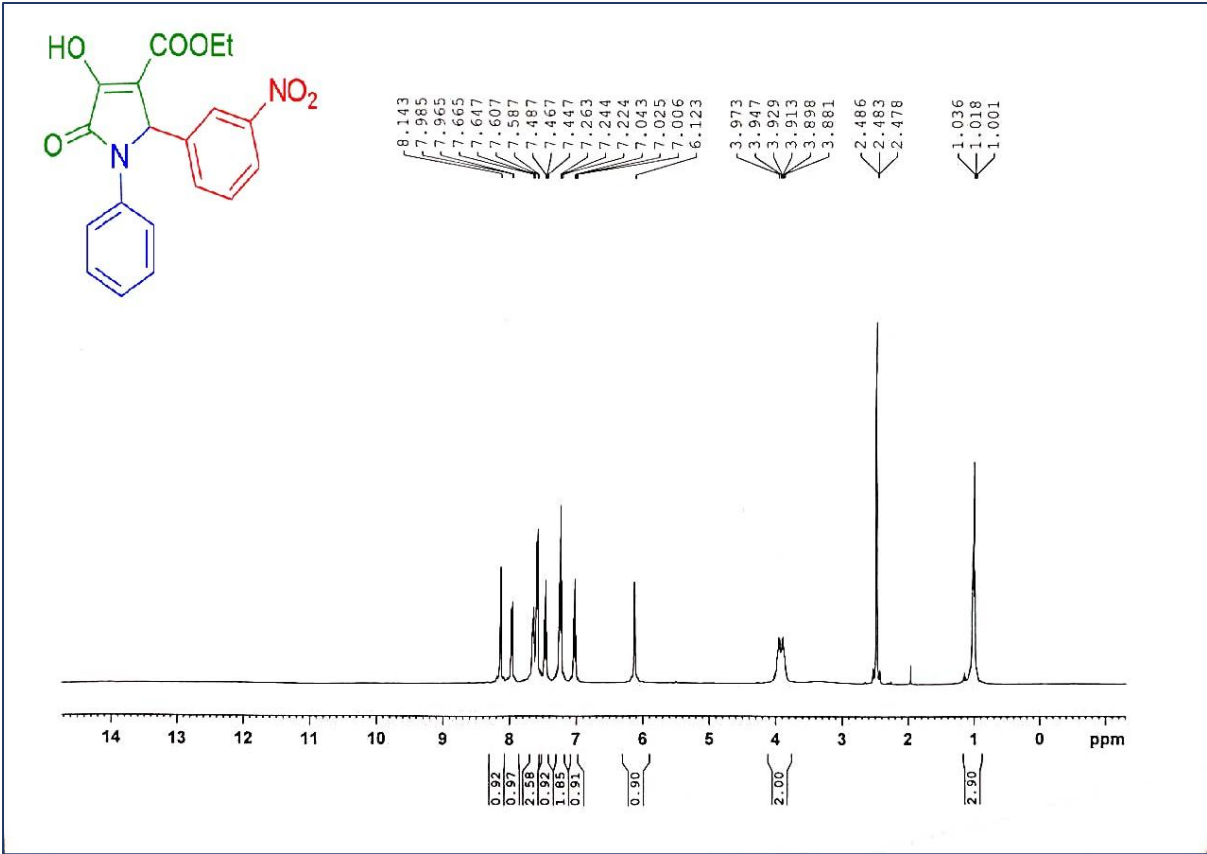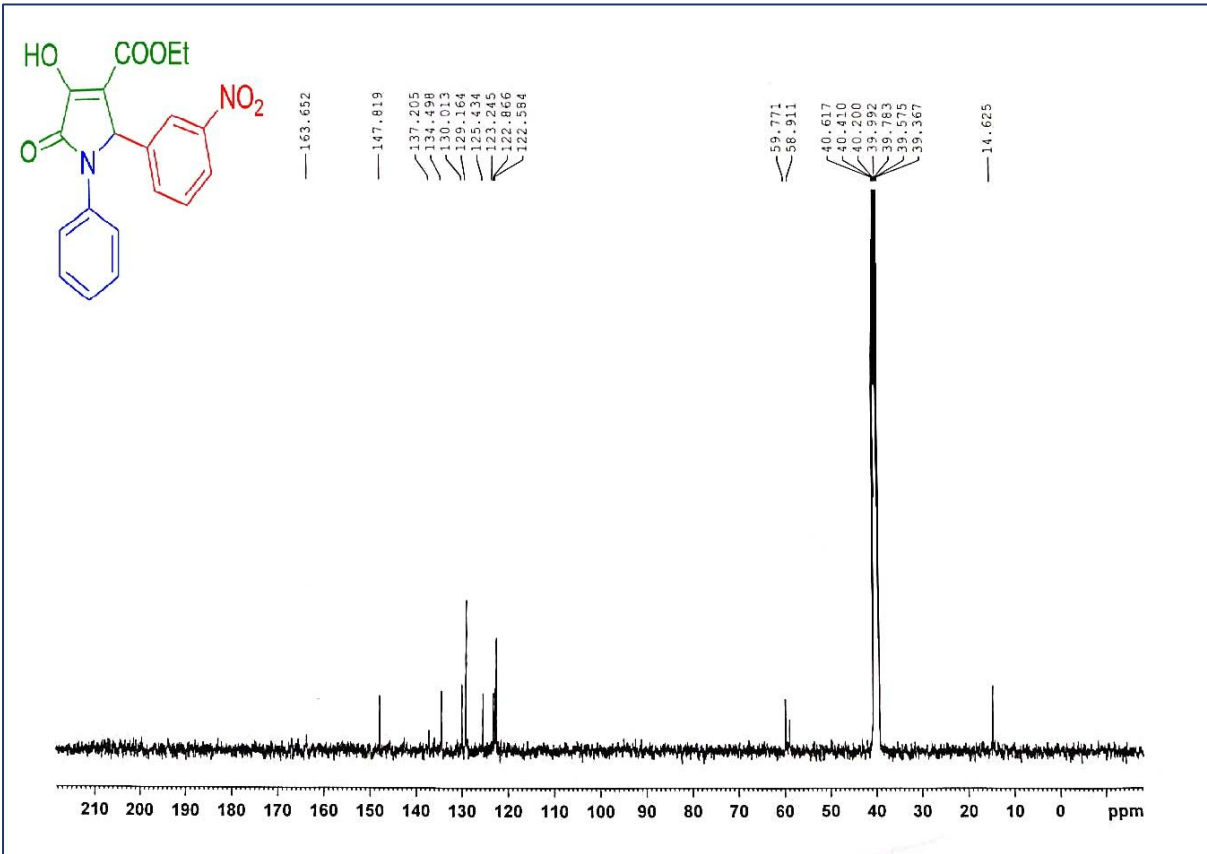

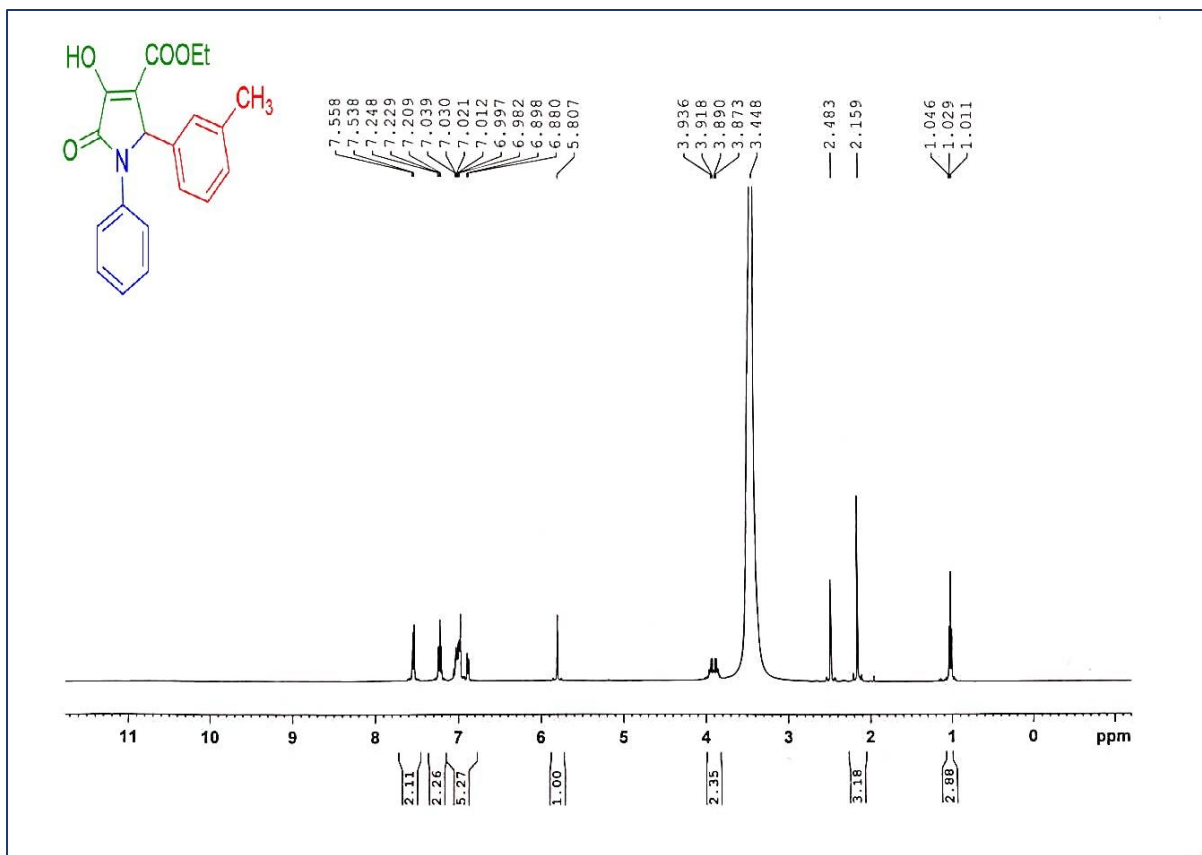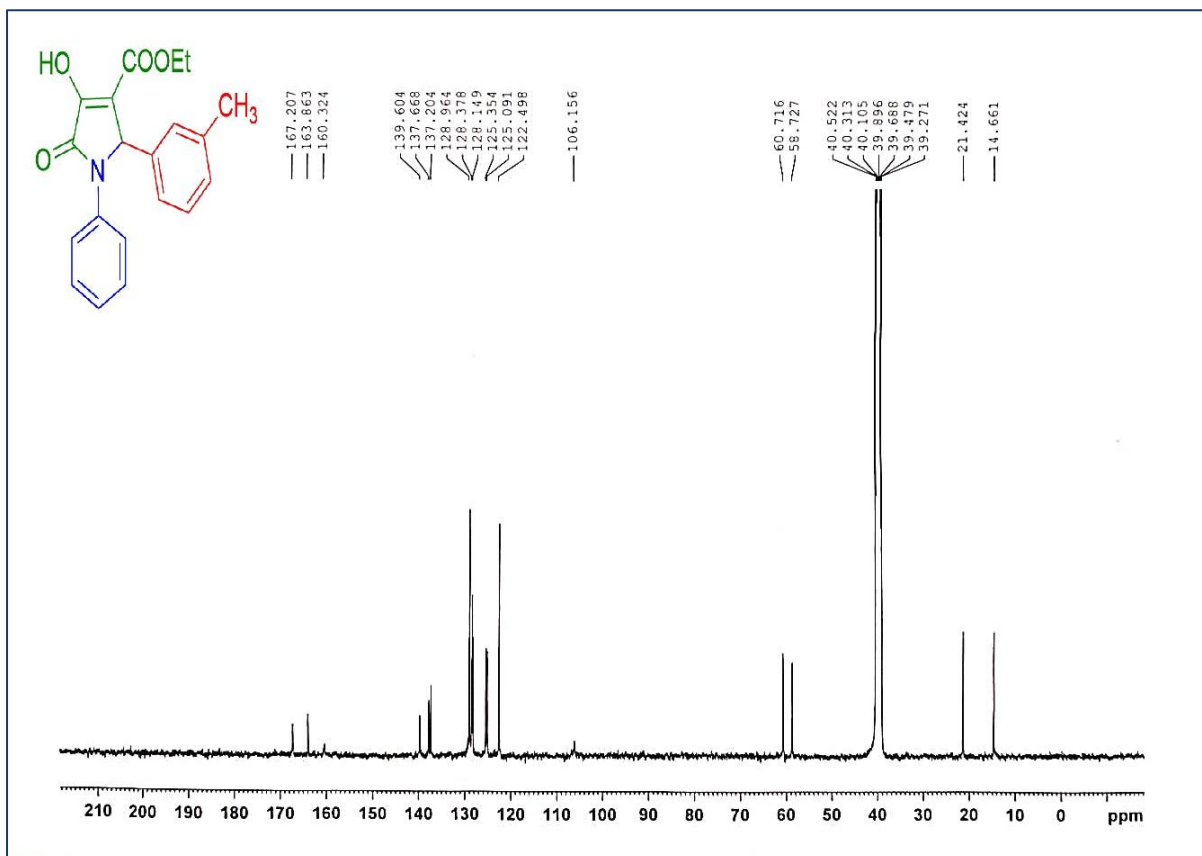



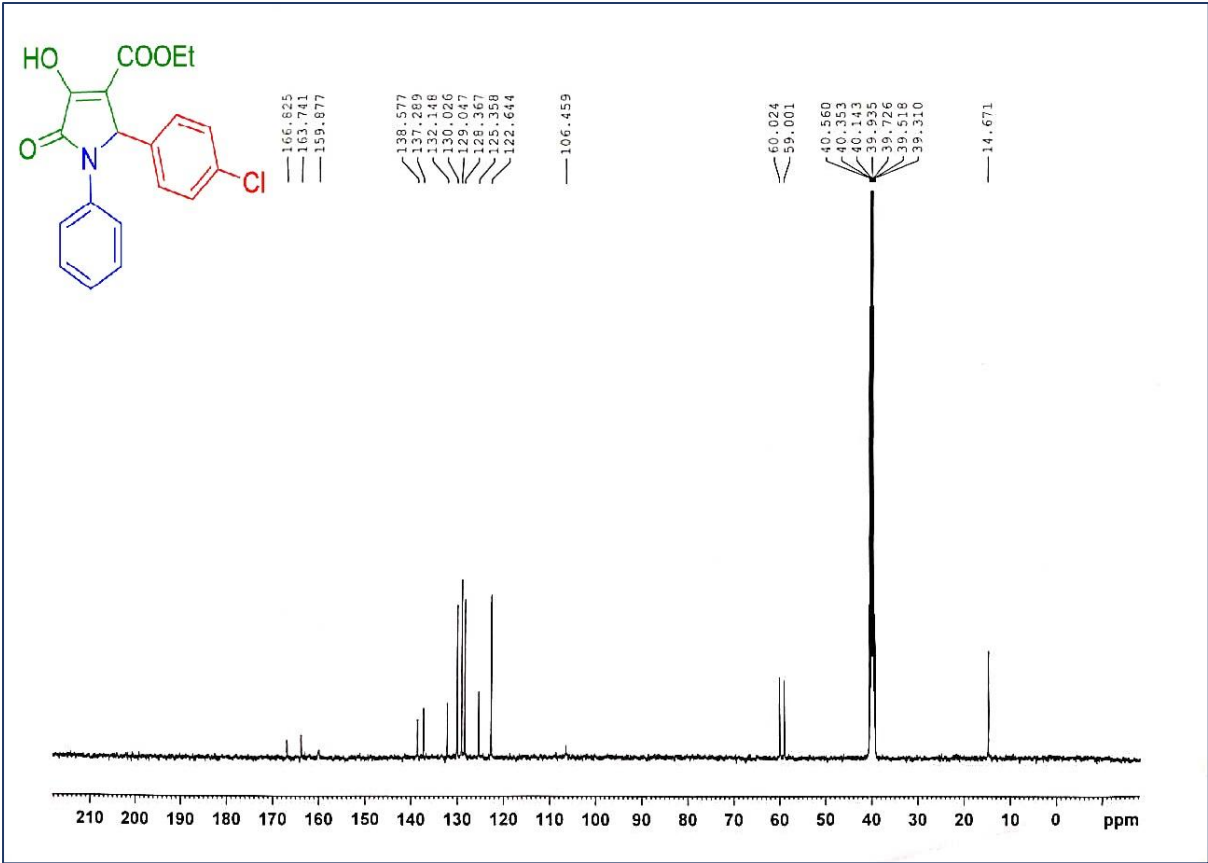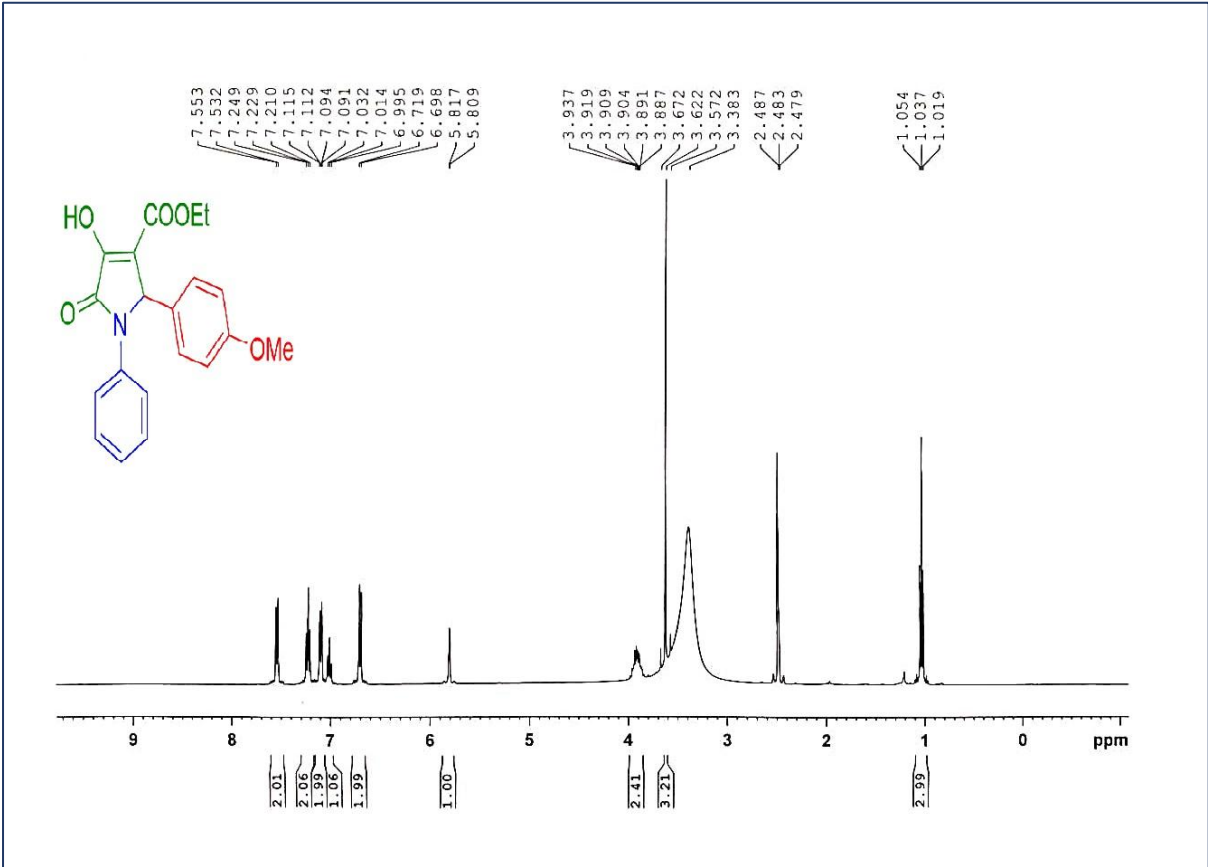

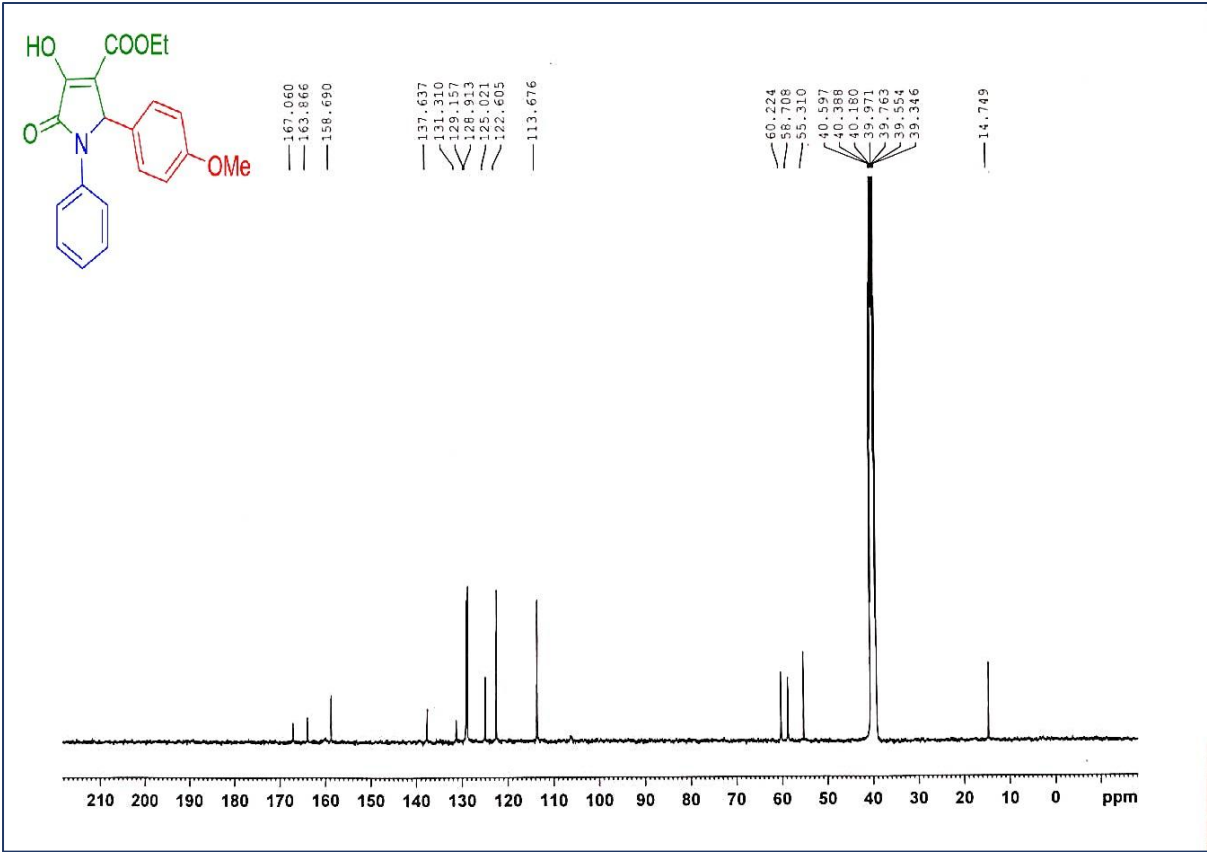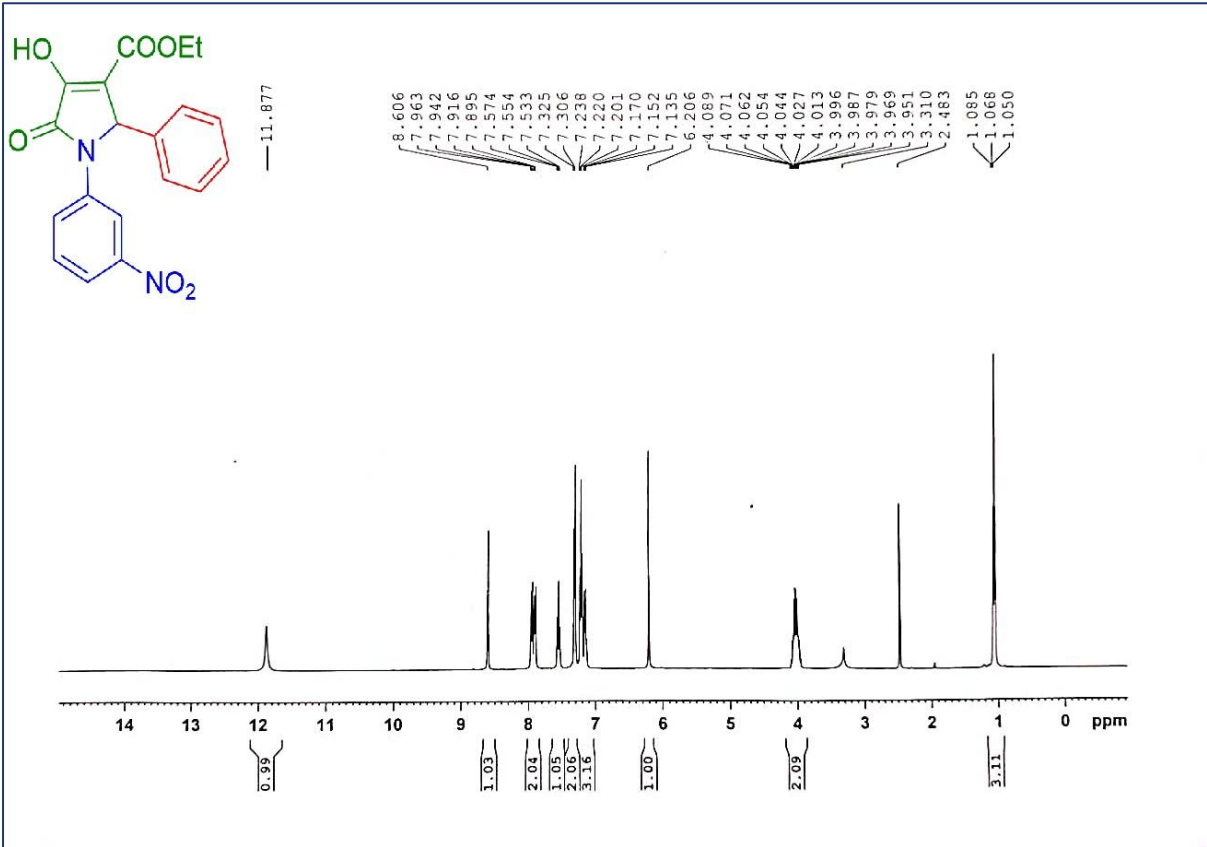

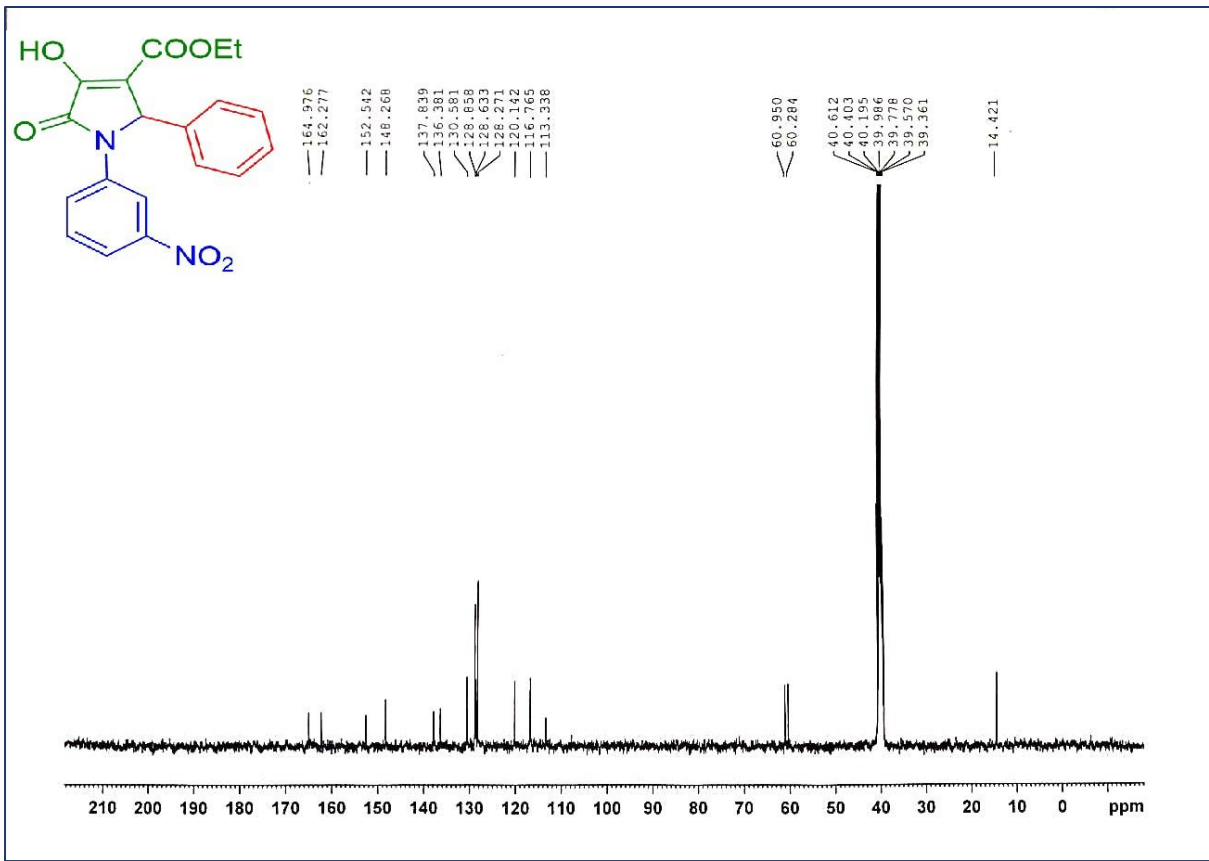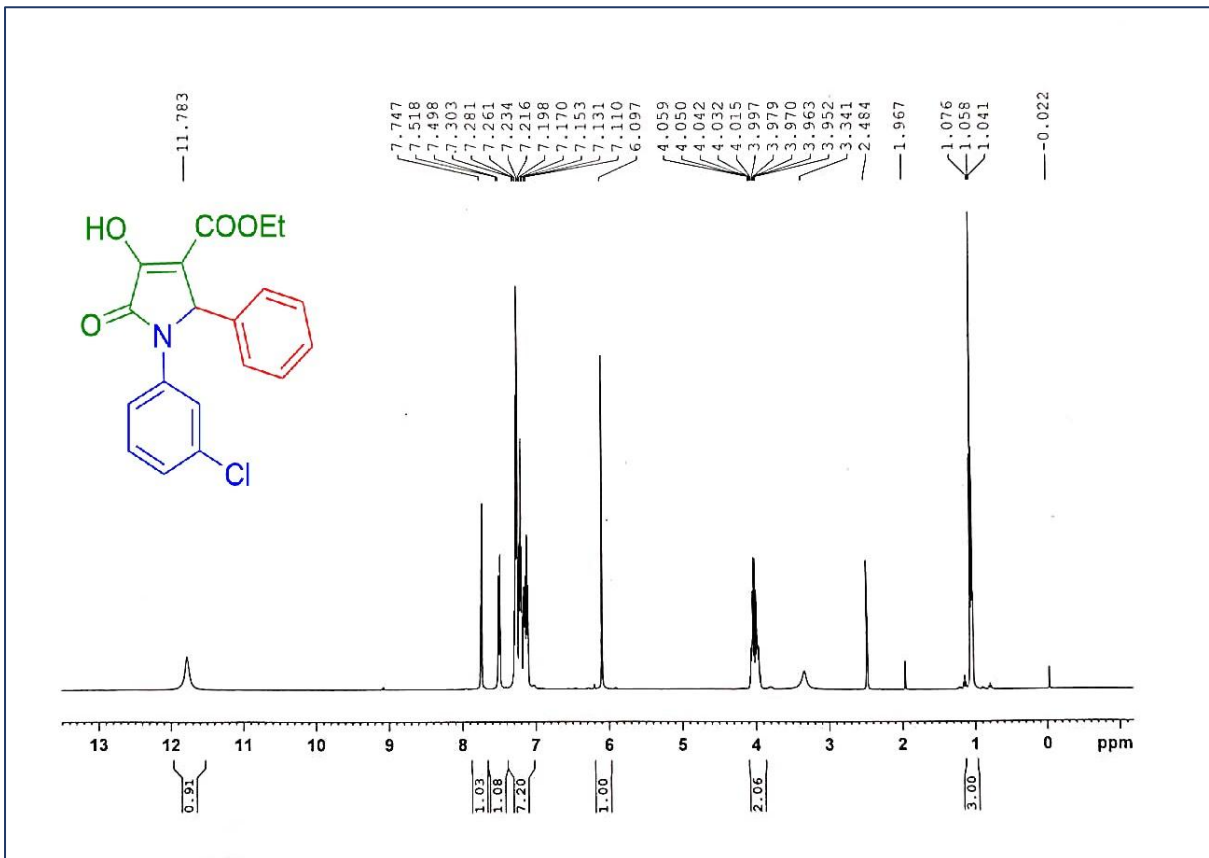

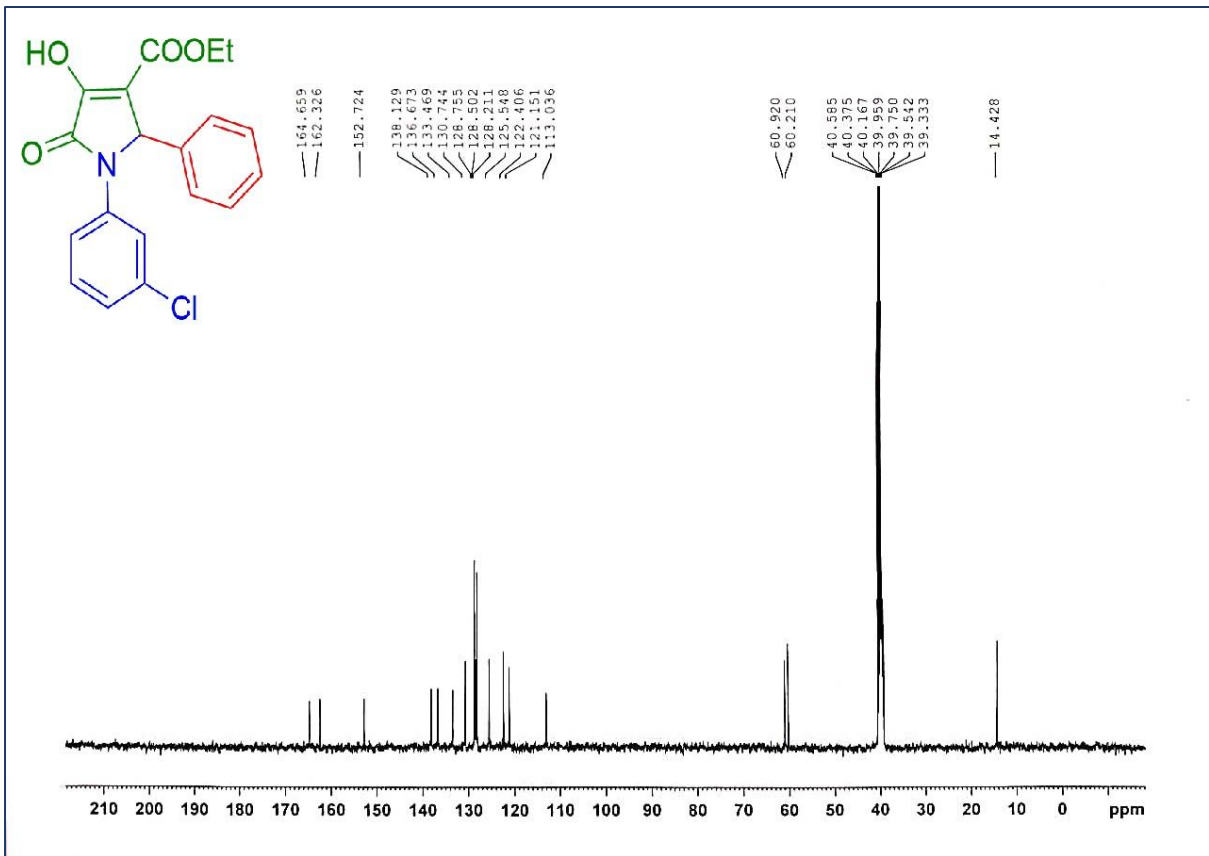

Supplement: d2ra08054k1.pdf [file d2ra08054k1.pdf]
